# Supplementary material for: Pore mutation N617D in the skeletal muscle DHPR blocks Ca2+ influx due to atypical high-affinity Ca2+ binding
Source: eLife. 2021 Jun 1;10:e63435. doi: 10.7554/eLife.63435 (PMC8184209; doi:10.7554/eLife.63435)
Supplement: Figure 1—source data 1. [file elife-63435-fig1-data1.xlsx]

## Sheet: IV wt
wt (no BayK)	Voltage	mean I (wt)	Std. Error	IV Fit Parameters	Predicted	Residuals	x-column	y-column		wt+BayK	Voltage	mean I (wt+BayK)	Std. Error	IV Fit Parameters	Predicted	Residuals	x-column	y-column
	-50	0.0266	0.017	0.1053	-8.8924e-05	0.0267	-50	-8.8924e-05			-50	0.0829	0.0334	0.1371	-0.00011934	0.083	-50	-0.00011934
	-40	0.0184	0.0127	5.1894	-0.0005619	0.0189	-49.4922	-9.7667e-05			-40	0.0836	0.061	4.3892	-0.0010749	0.0847	-49.4922	-0.00013345
	-30	0.0087345	0.0132	11.7801	-0.0035229	0.0123	-48.9844	-0.00010727			-30	0.0468	0.0701	2.28	-0.0096087	0.0564	-48.9844	-0.00014923
	-20	-0.0089317	0.0296	74.9569	-0.0219	0.0129	-48.4766	-0.00011781			-20	-0.0662	0.0769	79.6511	-0.0848	0.0185	-48.4766	-0.00016687
	-10	-0.0922	0.0291		-0.1326	0.0404	-47.9688	-0.00012939			-10	-0.7259	0.1463		-0.7059	-0.0201	-47.9688	-0.00018659
	0	-0.6053	0.1208		-0.7392	0.1339	-47.4609	-0.0001421			0	-4.0732	0.8766		-4.072	-0.0012342	-47.4609	-0.00020865
	10	-2.9633	0.482		-2.8398	-0.1236	-46.9531	-0.00015606			10	-8.115	0.6375		-8.1441	0.0291	-46.9531	-0.0002333
	20	-4.6581	0.2954		-4.803	0.1448	-46.4453	-0.00017138			20	-8.16	0.5113		-8.0344	-0.1256	-46.4453	-0.00026087
	30	-4.645	0.1841		-4.5978	-0.0472	-45.9375	-0.00018821			30	-7.0465	0.4452		-6.7932	-0.2532	-45.9375	-0.00029168
	40	-3.7539	0.1396		-3.6659	-0.088	-45.4297	-0.00020669			40	-5.4154	0.3753		-5.4339	0.0185	-45.4297	-0.00032613
	50	-2.6625	0.1357		-2.6269	-0.0356	-44.9219	-0.00022697			50	-3.8362	0.2357		-4.0641	0.2279	-44.9219	-0.00036465
	60	-1.5238	0.1563		-1.5752	0.0514	-44.4141	-0.00024925			60	-2.2796	0.1969		-2.6935	0.4139	-44.4141	-0.0004077
	70	-0.4067	0.1902		-0.5221	0.1153	-43.9063	-0.0002737			70	-1.0668	0.2704		-1.3229	0.2561	-43.9063	-0.00045584
	80	0.4514	0.2918		0.5312	-0.0798	-43.3984	-0.00030055			80	-0.516	0.2328		0.0478	-0.5638	-43.3984	-0.00050964
							-42.8906	-0.00033002									-42.8906	-0.00056979
							-42.3828	-0.00036238									-42.3828	-0.00063702
							-41.875	-0.0003979									-41.875	-0.00071218
							-41.3672	-0.0004369									-41.3672	-0.00079618
							-40.8594	-0.00047971									-40.8594	-0.00089009
							-40.3516	-0.0005267									-40.3516	-0.00099504
							-39.8438	-0.00057829									-39.8438	-0.0011124
							-39.3359	-0.00063491									-39.3359	-0.0012435
							-38.8281	-0.00069707									-38.8281	-0.00139
							-38.3203	-0.00076529									-38.3203	-0.0015538
							-37.8125	-0.00084018									-37.8125	-0.0017369
							-37.3047	-0.00092237									-37.3047	-0.0019414
							-36.7969	-0.0010126									-36.7969	-0.0021701
							-36.2891	-0.0011116									-36.2891	-0.0024256
							-35.7813	-0.0012203									-35.7813	-0.0027111
							-35.2734	-0.0013395									-35.2734	-0.0030302
							-34.7656	-0.0014704									-34.7656	-0.0033867
							-34.2578	-0.001614									-34.2578	-0.0037852
							-33.75	-0.0017717									-33.75	-0.0042304
							-33.2422	-0.0019446									-33.2422	-0.0047278
							-32.7344	-0.0021345									-32.7344	-0.0052836
							-32.2266	-0.0023427									-32.2266	-0.0059047
							-31.7188	-0.0025713									-31.7188	-0.0065985
							-31.2109	-0.0028221									-31.2109	-0.0073737
							-30.7031	-0.0030972									-30.7031	-0.0082397
							-30.1953	-0.0033991									-30.1953	-0.0092071
							-29.6875	-0.0037303									-29.6875	-0.0103
							-29.1797	-0.0040937									-29.1797	-0.0115
							-28.6719	-0.0044924									-28.6719	-0.0128
							-28.1641	-0.0049297									-28.1641	-0.0143
							-27.6563	-0.0054095									-27.6563	-0.016
							-27.1484	-0.0059358									-27.1484	-0.0179
							-26.6406	-0.006513									-26.6406	-0.02
							-26.1328	-0.0071463									-26.1328	-0.0224
							-25.625	-0.0078408									-25.625	-0.025
							-25.1172	-0.0086025									-25.1172	-0.0279
							-24.6094	-0.009438									-24.6094	-0.0312
							-24.1016	-0.0104									-24.1016	-0.0348
							-23.5938	-0.0114									-23.5938	-0.0389
							-23.0859	-0.0125									-23.0859	-0.0434
							-22.5781	-0.0137									-22.5781	-0.0485
							-22.0703	-0.015									-22.0703	-0.0541
							-21.5625	-0.0164									-21.5625	-0.0604
							-21.0547	-0.018									-21.0547	-0.0674
							-20.5469	-0.0198									-20.5469	-0.0753
							-20.0391	-0.0217									-20.0391	-0.084
							-19.5313	-0.0238									-19.5313	-0.0938
							-19.0234	-0.0261									-19.0234	-0.1047
							-18.5156	-0.0286									-18.5156	-0.1168
							-18.0078	-0.0314									-18.0078	-0.1303
							-17.5	-0.0344									-17.5	-0.1454
							-16.9922	-0.0377									-16.9922	-0.1621
							-16.4844	-0.0413									-16.4844	-0.1808
							-15.9766	-0.0453									-15.9766	-0.2015
							-15.4688	-0.0497									-15.4688	-0.2246
							-14.9609	-0.0544									-14.9609	-0.2503
							-14.4531	-0.0597									-14.4531	-0.2788
							-13.9453	-0.0654									-13.9453	-0.3105
							-13.4375	-0.0716									-13.4375	-0.3457
							-12.9297	-0.0785									-12.9297	-0.3847
							-12.4219	-0.086									-12.4219	-0.4279
							-11.9141	-0.0942									-11.9141	-0.4758
							-11.4063	-0.1032									-11.4063	-0.5287
							-10.8984	-0.113									-10.8984	-0.5872
							-10.3906	-0.1237									-10.3906	-0.6518
							-9.8828	-0.1354									-9.8828	-0.7229
							-9.375	-0.1482									-9.375	-0.8012
							-8.8672	-0.1621									-8.8672	-0.8872
							-8.3594	-0.1774									-8.3594	-0.9815
							-7.8516	-0.194									-7.8516	-1.0847
							-7.3438	-0.2122									-7.3438	-1.1974
							-6.8359	-0.232									-6.8359	-1.3201
							-6.3281	-0.2535									-6.3281	-1.4535
							-5.8203	-0.277									-5.8203	-1.598
							-5.3125	-0.3026									-5.3125	-1.7539
							-4.8047	-0.3303									-4.8047	-1.9218
							-4.2969	-0.3605									-4.2969	-2.1018
							-3.7891	-0.3933									-3.7891	-2.2939
							-3.2813	-0.4288									-3.2813	-2.4981
							-2.7734	-0.4673									-2.7734	-2.7142
							-2.2656	-0.509									-2.2656	-2.9416
							-1.7578	-0.5541									-1.7578	-3.1798
							-1.25	-0.6028									-1.25	-3.4277
							-0.7422	-0.6553									-0.7422	-3.6843
							-0.2344	-0.7118									-0.2344	-3.9482
							0.2734	-0.7725									0.2734	-4.2177
							0.7813	-0.8376									0.7813	-4.4912
							1.2891	-0.9074									1.2891	-4.7667
							1.7969	-0.982									1.7969	-5.0422
							2.3047	-1.0615									2.3047	-5.3157
							2.8125	-1.1461									2.8125	-5.585
							3.3203	-1.2359									3.3203	-5.8483
							3.8281	-1.3309									3.8281	-6.1034
							4.3359	-1.4311									4.3359	-6.3488
							4.8438	-1.5365									4.8438	-6.5829
							5.3516	-1.6469									5.3516	-6.8044
							5.8594	-1.7623									5.8594	-7.0121
							6.3672	-1.8823									6.3672	-7.2053
							6.875	-2.0067									6.875	-7.3834
							7.3828	-2.1351									7.3828	-7.5461
							7.8906	-2.267									7.8906	-7.6933
							8.3984	-2.4018									8.3984	-7.8251
							8.9063	-2.5391									8.9063	-7.9418
							9.4141	-2.6781									9.4141	-8.0438
							9.9219	-2.8182									9.9219	-8.1318
							10.4297	-2.9585									10.4297	-8.2063
							10.9375	-3.0983									10.9375	-8.2681
							11.4453	-3.2368									11.4453	-8.318
							11.9531	-3.3732									11.9531	-8.3568
							12.4609	-3.5068									12.4609	-8.3851
							12.9688	-3.6367									12.9688	-8.404
							13.4766	-3.7623									13.4766	-8.414
							13.9844	-3.8828									13.9844	-8.416
							14.4922	-3.9978									14.4922	-8.4106
							15	-4.1068									15	-8.3985
							15.5078	-4.2092									15.5078	-8.3804
							16.0156	-4.3048									16.0156	-8.3568
							16.5234	-4.3932									16.5234	-8.3282
							17.0313	-4.4744									17.0313	-8.2952
							17.5391	-4.5482									17.5391	-8.2582
							18.0469	-4.6147									18.0469	-8.2176
							18.5547	-4.6737									18.5547	-8.1738
							19.0625	-4.7256									19.0625	-8.1271
							19.5703	-4.7704									19.5703	-8.0779
							20.0781	-4.8084									20.0781	-8.0263
							20.5859	-4.8397									20.5859	-7.9728
							21.0938	-4.8647									21.0938	-7.9174
							21.6016	-4.8838									21.6016	-7.8604
							22.1094	-4.8971									22.1094	-7.8019
							22.6172	-4.905									22.6172	-7.7422
							23.125	-4.9078									23.125	-7.6813
							23.6328	-4.9059									23.6328	-7.6195
							24.1406	-4.8996									24.1406	-7.5567
							24.6484	-4.8892									24.6484	-7.4932
							25.1563	-4.875									25.1563	-7.4289
							25.6641	-4.8572									25.6641	-7.3641
							26.1719	-4.8362									26.1719	-7.2987
							26.6797	-4.8123									26.6797	-7.2328
							27.1875	-4.7855									27.1875	-7.1664
							27.6953	-4.7563									27.6953	-7.0997
							28.2031	-4.7248									28.2031	-7.0327
							28.7109	-4.6912									28.7109	-6.9653
							29.2188	-4.6557									29.2188	-6.8977
							29.7266	-4.6185									29.7266	-6.8299
							30.2344	-4.5796									30.2344	-6.7618
							30.7422	-4.5394									30.7422	-6.6936
							31.25	-4.4978									31.25	-6.6252
							31.7578	-4.4551									31.7578	-6.5566
							32.2656	-4.4113									32.2656	-6.488
							32.7734	-4.3665									32.7734	-6.4192
							33.2813	-4.3209									33.2813	-6.3503
							33.7891	-4.2745									33.7891	-6.2814
							34.2969	-4.2273									34.2969	-6.2123
							34.8047	-4.1796									34.8047	-6.1432
							35.3125	-4.1312									35.3125	-6.0741
							35.8203	-4.0823									35.8203	-6.0049
							36.3281	-4.033									36.3281	-5.9356
							36.8359	-3.9832									36.8359	-5.8663
							37.3438	-3.9331									37.3438	-5.797
							37.8516	-3.8826									37.8516	-5.7276
							38.3594	-3.8318									38.3594	-5.6582
							38.8672	-3.7807									38.8672	-5.5888
							39.375	-3.7294									39.375	-5.5193
							39.8828	-3.6778									39.8828	-5.4499
							40.3906	-3.6261									40.3906	-5.3804
							40.8984	-3.5741									40.8984	-5.3109
							41.4063	-3.522									41.4063	-5.2414
							41.9141	-3.4698									41.9141	-5.1719
							42.4219	-3.4174									42.4219	-5.1024
							42.9297	-3.3649									42.9297	-5.0328
							43.4375	-3.3124									43.4375	-4.9633
							43.9453	-3.2597									43.9453	-4.8937
							44.4531	-3.2069									44.4531	-4.8242
							44.9609	-3.154									44.9609	-4.7546
							45.4688	-3.1011									45.4688	-4.685
							45.9766	-3.0482									45.9766	-4.6154
							46.4844	-2.9951									46.4844	-4.5459
							46.9922	-2.9421									46.9922	-4.4763
							47.5	-2.8889									47.5	-4.4067
							48.0078	-2.8358									48.0078	-4.3371
							48.5156	-2.7826									48.5156	-4.2675
							49.0234	-2.7294									49.0234	-4.1979
							49.5313	-2.6761									49.5313	-4.1284
							50.0391	-2.6228									50.0391	-4.0588
							50.5469	-2.5695									50.5469	-3.9892
							51.0547	-2.5162									51.0547	-3.9196
							51.5625	-2.4629									51.5625	-3.85
							52.0703	-2.4095									52.0703	-3.7804
							52.5781	-2.3561									52.5781	-3.7108
							53.0859	-2.3028									53.0859	-3.6412
							53.5938	-2.2494									53.5938	-3.5716
							54.1016	-2.196									54.1016	-3.502
							54.6094	-2.1425									54.6094	-3.4324
							55.1172	-2.0891									55.1172	-3.3628
							55.625	-2.0357									55.625	-3.2932
							56.1328	-1.9823									56.1328	-3.2236
							56.6406	-1.9288									56.6406	-3.154
							57.1484	-1.8754									57.1484	-3.0844
							57.6563	-1.8219									57.6563	-3.0148
							58.1641	-1.7685									58.1641	-2.9452
							58.6719	-1.715									58.6719	-2.8756
							59.1797	-1.6616									59.1797	-2.806
							59.6875	-1.6081									59.6875	-2.7363
							60.1953	-1.5546									60.1953	-2.6667
							60.7031	-1.5012									60.7031	-2.5971
							61.2109	-1.4477									61.2109	-2.5275
							61.7188	-1.3942									61.7188	-2.4579
							62.2266	-1.3407									62.2266	-2.3883
							62.7344	-1.2873									62.7344	-2.3187
							63.2422	-1.2338									63.2422	-2.2491
							63.75	-1.1803									63.75	-2.1795
							64.2578	-1.1268									64.2578	-2.1099
							64.7656	-1.0734									64.7656	-2.0403
							65.2734	-1.0199									65.2734	-1.9707
							65.7813	-0.9664									65.7813	-1.9011
							66.2891	-0.9129									66.2891	-1.8315
							66.7969	-0.8594									66.7969	-1.7619
							67.3047	-0.8059									67.3047	-1.6923
							67.8125	-0.7525									67.8125	-1.6227
							68.3203	-0.699									68.3203	-1.5531
							68.8281	-0.6455									68.8281	-1.4835
							69.3359	-0.592									69.3359	-1.4139
							69.8438	-0.5385									69.8438	-1.3443
							70.3516	-0.485									70.3516	-1.2747
							70.8594	-0.4316									70.8594	-1.2051
							71.3672	-0.3781									71.3672	-1.1355
							71.875	-0.3246									71.875	-1.0659
							72.3828	-0.2711									72.3828	-0.9962
							72.8906	-0.2176									72.8906	-0.9266
							73.3984	-0.1641									73.3984	-0.857
							73.9063	-0.1107									73.9063	-0.7874
							74.4141	-0.0572									74.4141	-0.7178
							74.9219	-0.0036877									74.9219	-0.6482
							75.4297	0.0498									75.4297	-0.5786
							75.9375	0.1033									75.9375	-0.509
							76.4453	0.1568									76.4453	-0.4394
							76.9531	0.2103									76.9531	-0.3698
							77.4609	0.2637									77.4609	-0.3002
							77.9688	0.3172									77.9688	-0.2306
							78.4766	0.3707									78.4766	-0.161
							78.9844	0.4242									78.9844	-0.0914
							79.4922	0.4777									79.4922	-0.0218
							80	0.5312									80	0.0478

## Sheet: IV nc(DHPR)
nc(DHPR)	Voltage	mean I (nc(DHPR))	Std. Error	IV Fit Parameters	Predicted	Residuals	x-column	y-column		nc(DHPR)	Voltage	mean I (nc(DHPR))	Std. Error	IV Fit Parameters	Predicted	Residuals	x-column	y-column
(no BayK)										(+ BayK)
	-50	0.0299	0.0232	0.0074142	-0.0015561	0.0315	-50	-0.0015561			-50	0.0105	0.0093726	0.0021666	3.0242e-05	0.0104	-50	3.0242e-05
	-40	0.0043295	0.0050917	22.9591	-0.0017366	0.0060661	-49.4922	-0.0015684			-40	0.0023654	0.0084575	10.3447	8.7991e-05	0.0022774	-49.4922	3.1936e-05
	-30	-0.0064913	0.0057926	68.1537	-0.0016543	-0.0048369	-48.9844	-0.0015805			-30	-0.0049988	0.0104	41.1356	0.00025353	-0.0052523	-48.9844	3.3723e-05
	-20	-0.0114	0.0078016	-13.7357	-0.00097765	-0.0105	-48.4766	-0.0015923			-20	-0.0043688	0.0082602	-143.541	0.00072407	-0.0050929	-48.4766	3.561e-05
	-10	-0.0091429	0.0070928		0.00089102	-0.01	-47.9688	-0.0016039			-10	-0.0138	0.0085586		0.0020488	-0.0158	-47.9688	3.7601e-05
	0	-0.003478	0.0109		0.0049769	-0.0084549	-47.4609	-0.0016153			0	-0.0202	0.0088279		0.005724	-0.0259	-47.4609	3.9702e-05
	10	0.00062687	0.0178		0.0129	-0.0123	-46.9531	-0.0016263			10	0.0161	0.022		0.0156	0.00042091	-46.9531	4.192e-05
	20	0.0602	0.0308		0.0274	0.0329	-46.4453	-0.001637			20	0.0582	0.0302		0.0407	0.0175	-46.4453	4.426e-05
	30	0.0483	0.0225		0.0517	-0.0034073	-45.9375	-0.0016474			30	0.1116	0.0223		0.0956	0.0161	-45.9375	4.673e-05
	40	0.0852	0.031		0.0904	-0.0051901	-45.4297	-0.0016574			40	0.1839	0.0298		0.1879	-0.0040725	-45.4297	4.9336e-05
	50	0.1478	0.035		0.1474	0.00032787	-44.9219	-0.0016671			50	0.269	0.0722		0.2944	-0.0254	-44.9219	5.2086e-05
	60	0.2171	0.0432		0.2253	-0.0081643	-44.4141	-0.0016763			60	0.4112	0.0634		0.3797	0.0315	-44.4141	5.4987e-05
	70	0.3328	0.0674		0.3229	0.0099273	-43.9063	-0.0016852			70	0.492	0.0609		0.4359	0.0561	-43.9063	5.8049e-05
	80	0.4322	0.0479		0.4352	-0.0030222	-43.3984	-0.0016936			80	0.4332	0.0594		0.4733	-0.0401	-43.3984	6.128e-05
							-42.8906	-0.0017015									-42.8906	6.4688e-05
							-42.3828	-0.001709									-42.3828	6.8285e-05
							-41.875	-0.0017159									-41.875	7.2079e-05
							-41.3672	-0.0017223									-41.3672	7.6083e-05
							-40.8594	-0.0017281									-40.8594	8.0307e-05
							-40.3516	-0.0017334									-40.3516	8.4763e-05
							-39.8438	-0.001738									-39.8438	8.9464e-05
							-39.3359	-0.0017419									-39.3359	9.4424e-05
							-38.8281	-0.0017452									-38.8281	9.9656e-05
							-38.3203	-0.0017478									-38.3203	0.00010518
							-37.8125	-0.0017496									-37.8125	0.000111
							-37.3047	-0.0017506									-37.3047	0.00011714
							-36.7969	-0.0017508									-36.7969	0.00012362
							-36.2891	-0.0017501									-36.2891	0.00013045
							-35.7813	-0.0017486									-35.7813	0.00013766
							-35.2734	-0.0017461									-35.2734	0.00014526
							-34.7656	-0.0017426									-34.7656	0.00015328
							-34.2578	-0.0017381									-34.2578	0.00016174
							-33.75	-0.0017326									-33.75	0.00017066
							-33.2422	-0.0017259									-33.2422	0.00018007
							-32.7344	-0.0017182									-32.7344	0.00019
							-32.2266	-0.0017092									-32.2266	0.00020046
							-31.7188	-0.0016989									-31.7188	0.0002115
							-31.2109	-0.0016874									-31.2109	0.00022314
							-30.7031	-0.0016745									-30.7031	0.00023542
							-30.1953	-0.0016602									-30.1953	0.00024836
							-29.6875	-0.0016445									-29.6875	0.00026201
							-29.1797	-0.0016272									-29.1797	0.00027641
							-28.6719	-0.0016084									-28.6719	0.00029159
							-28.1641	-0.001588									-28.1641	0.0003076
							-27.6563	-0.0015658									-27.6563	0.00032448
							-27.1484	-0.0015419									-27.1484	0.00034227
							-26.6406	-0.0015162									-26.6406	0.00036104
							-26.1328	-0.0014886									-26.1328	0.00038082
							-25.625	-0.001459									-25.625	0.00040168
							-25.1172	-0.0014274									-25.1172	0.00042368
							-24.6094	-0.0013937									-24.6094	0.00044686
							-24.1016	-0.0013578									-24.1016	0.00047131
							-23.5938	-0.0013196									-23.5938	0.00049708
							-23.0859	-0.0012791									-23.0859	0.00052425
							-22.5781	-0.0012362									-22.5781	0.0005529
							-22.0703	-0.0011908									-22.0703	0.00058309
							-21.5625	-0.0011427									-21.5625	0.00061492
							-21.0547	-0.001092									-21.0547	0.00064847
							-20.5469	-0.0010385									-20.5469	0.00068384
							-20.0391	-0.00098211									-20.0391	0.00072112
							-19.5313	-0.00092275									-19.5313	0.00076041
							-19.0234	-0.00086031									-19.0234	0.00080183
							-18.5156	-0.00079469									-18.5156	0.00084548
							-18.0078	-0.00072579									-18.0078	0.00089149
							-17.5	-0.00065348									-17.5	0.00093997
							-16.9922	-0.00057766									-16.9922	0.00099107
							-16.4844	-0.00049822									-16.4844	0.0010449
							-15.9766	-0.00041503									-15.9766	0.0011017
							-15.4688	-0.00032797									-15.4688	0.0011615
							-14.9609	-0.00023692									-14.9609	0.0012245
							-14.4531	-0.00014174									-14.4531	0.0012909
							-13.9453	-4.231e-05									-13.9453	0.0013609
							-13.4375	6.1516e-05									-13.4375	0.0014346
							-12.9297	0.00016988									-12.9297	0.0015123
							-12.4219	0.00028291									-12.4219	0.0015941
							-11.9141	0.00040077									-11.9141	0.0016803
							-11.4063	0.0005236									-11.4063	0.0017711
							-10.8984	0.00065156									-10.8984	0.0018668
							-10.3906	0.00078482									-10.3906	0.0019676
							-9.8828	0.00092352									-9.8828	0.0020738
							-9.375	0.0010678									-9.375	0.0021856
							-8.8672	0.001218									-8.8672	0.0023034
							-8.3594	0.001374									-8.3594	0.0024275
							-7.8516	0.0015363									-7.8516	0.0025581
							-7.3438	0.0017048									-7.3438	0.0026957
							-6.8359	0.0018799									-6.8359	0.0028406
							-6.3281	0.0020617									-6.3281	0.0029931
							-5.8203	0.0022504									-5.8203	0.0031538
							-5.3125	0.0024463									-5.3125	0.0033229
							-4.8047	0.0026494									-4.8047	0.0035009
							-4.2969	0.0028602									-4.2969	0.0036884
							-3.7891	0.0030786									-3.7891	0.0038857
							-3.2813	0.0033051									-3.2813	0.0040934
							-2.7734	0.0035397									-2.7734	0.004312
							-2.2656	0.0037829									-2.2656	0.0045421
							-1.7578	0.0040347									-1.7578	0.0047842
							-1.25	0.0042954									-1.25	0.0050389
							-0.7422	0.0045654									-0.7422	0.005307
							-0.2344	0.0048447									-0.2344	0.005589
							0.2734	0.0051338									0.2734	0.0058857
							0.7813	0.0054329									0.7813	0.0061977
							1.2891	0.0057422									1.2891	0.006526
							1.7969	0.0060621									1.7969	0.0068712
							2.3047	0.0063927									2.3047	0.0072341
							2.8125	0.0067345									2.8125	0.0076158
							3.3203	0.0070877									3.3203	0.0080171
							3.8281	0.0074526									3.8281	0.0084388
							4.3359	0.0078296									4.3359	0.0088822
							4.8438	0.0082189									4.8438	0.0093481
							5.3516	0.0086208									5.3516	0.0098376
							5.8594	0.0090358									5.8594	0.0104
							6.3672	0.0094641									6.3672	0.0109
							6.875	0.0099061									6.875	0.0115
							7.3828	0.0104									7.3828	0.0121
							7.8906	0.0108									7.8906	0.0127
							8.3984	0.0113									8.3984	0.0133
							8.9063	0.0118									8.9063	0.014
							9.4141	0.0123									9.4141	0.0148
							9.9219	0.0129									9.9219	0.0155
							10.4297	0.0134									10.4297	0.0163
							10.9375	0.014									10.9375	0.0171
							11.4453	0.0146									11.4453	0.018
							11.9531	0.0152									11.9531	0.0189
							12.4609	0.0158									12.4609	0.0199
							12.9688	0.0164									12.9688	0.0209
							13.4766	0.0171									13.4766	0.022
							13.9844	0.0177									13.9844	0.0231
							14.4922	0.0184									14.4922	0.0242
							15	0.0191									15	0.0254
							15.5078	0.0199									15.5078	0.0267
							16.0156	0.0206									16.0156	0.028
							16.5234	0.0214									16.5234	0.0294
							17.0313	0.0222									17.0313	0.0308
							17.5391	0.023									17.5391	0.0324
							18.0469	0.0239									18.0469	0.0339
							18.5547	0.0247									18.5547	0.0356
							19.0625	0.0256									19.0625	0.0373
							19.5703	0.0266									19.5703	0.0391
							20.0781	0.0275									20.0781	0.0409
							20.5859	0.0285									20.5859	0.0429
							21.0938	0.0295									21.0938	0.0449
							21.6016	0.0305									21.6016	0.047
							22.1094	0.0315									22.1094	0.0492
							22.6172	0.0326									22.6172	0.0515
							23.125	0.0337									23.125	0.0539
							23.6328	0.0348									23.6328	0.0563
							24.1406	0.036									24.1406	0.0589
							24.6484	0.0372									24.6484	0.0615
							25.1563	0.0384									25.1563	0.0643
							25.6641	0.0397									25.6641	0.0671
							26.1719	0.041									26.1719	0.0701
							26.6797	0.0423									26.6797	0.0731
							27.1875	0.0436									27.1875	0.0763
							27.6953	0.045									27.6953	0.0795
							28.2031	0.0464									28.2031	0.0829
							28.7109	0.0479									28.7109	0.0863
							29.2188	0.0494									29.2188	0.0899
							29.7266	0.0509									29.7266	0.0935
							30.2344	0.0525									30.2344	0.0973
							30.7422	0.054									30.7422	0.1012
							31.25	0.0557									31.25	0.1052
							31.7578	0.0574									31.7578	0.1093
							32.2656	0.0591									32.2656	0.1135
							32.7734	0.0608									32.7734	0.1177
							33.2813	0.0626									33.2813	0.1221
							33.7891	0.0644									33.7891	0.1266
							34.2969	0.0663									34.2969	0.1312
							34.8047	0.0682									34.8047	0.1359
							35.3125	0.0702									35.3125	0.1406
							35.8203	0.0722									35.8203	0.1455
							36.3281	0.0742									36.3281	0.1504
							36.8359	0.0763									36.8359	0.1554
							37.3438	0.0785									37.3438	0.1604
							37.8516	0.0806									37.8516	0.1656
							38.3594	0.0829									38.3594	0.1708
							38.8672	0.0851									38.8672	0.176
							39.375	0.0875									39.375	0.1813
							39.8828	0.0898									39.8828	0.1867
							40.3906	0.0922									40.3906	0.1921
							40.8984	0.0947									40.8984	0.1975
							41.4063	0.0972									41.4063	0.203
							41.9141	0.0998									41.9141	0.2085
							42.4219	0.1024									42.4219	0.214
							42.9297	0.105									42.9297	0.2195
							43.4375	0.1077									43.4375	0.225
							43.9453	0.1105									43.9453	0.2305
							44.4531	0.1133									44.4531	0.236
							44.9609	0.1162									44.9609	0.2415
							45.4688	0.1191									45.4688	0.247
							45.9766	0.1221									45.9766	0.2525
							46.4844	0.1251									46.4844	0.2579
							46.9922	0.1281									46.9922	0.2633
							47.5	0.1313									47.5	0.2687
							48.0078	0.1345									48.0078	0.274
							48.5156	0.1377									48.5156	0.2793
							49.0234	0.141									49.0234	0.2845
							49.5313	0.1443									49.5313	0.2897
							50.0391	0.1477									50.0391	0.2948
							50.5469	0.1512									50.5469	0.2998
							51.0547	0.1547									51.0547	0.3048
							51.5625	0.1582									51.5625	0.3097
							52.0703	0.1618									52.0703	0.3145
							52.5781	0.1655									52.5781	0.3193
							53.0859	0.1692									53.0859	0.324
							53.5938	0.173									53.5938	0.3286
							54.1016	0.1768									54.1016	0.3331
							54.6094	0.1807									54.6094	0.3375
							55.1172	0.1847									55.1172	0.3419
							55.625	0.1887									55.625	0.3462
							56.1328	0.1927									56.1328	0.3504
							56.6406	0.1968									56.6406	0.3545
							57.1484	0.201									57.1484	0.3585
							57.6563	0.2052									57.6563	0.3625
							58.1641	0.2095									58.1641	0.3664
							58.6719	0.2138									58.6719	0.3702
							59.1797	0.2181									59.1797	0.3739
							59.6875	0.2226									59.6875	0.3775
							60.1953	0.227									60.1953	0.381
							60.7031	0.2316									60.7031	0.3845
							61.2109	0.2361									61.2109	0.3879
							61.7188	0.2408									61.7188	0.3912
							62.2266	0.2455									62.2266	0.3945
							62.7344	0.2502									62.7344	0.3976
							63.2422	0.255									63.2422	0.4007
							63.75	0.2598									63.75	0.4037
							64.2578	0.2647									64.2578	0.4067
							64.7656	0.2696									64.7656	0.4096
							65.2734	0.2745									65.2734	0.4124
							65.7813	0.2796									65.7813	0.4152
							66.2891	0.2846									66.2891	0.4179
							66.7969	0.2897									66.7969	0.4205
							67.3047	0.2949									67.3047	0.4231
							67.8125	0.3001									67.8125	0.4256
							68.3203	0.3053									68.3203	0.4281
							68.8281	0.3106									68.8281	0.4305
							69.3359	0.3159									69.3359	0.4329
							69.8438	0.3212									69.8438	0.4352
							70.3516	0.3266									70.3516	0.4374
							70.8594	0.3321									70.8594	0.4397
							71.3672	0.3375									71.3672	0.4418
							71.875	0.343									71.875	0.444
							72.3828	0.3486									72.3828	0.4461
							72.8906	0.3541									72.8906	0.4481
							73.3984	0.3598									73.3984	0.4501
							73.9063	0.3654									73.9063	0.4521
							74.4141	0.3711									74.4141	0.454
							74.9219	0.3768									74.9219	0.4559
							75.4297	0.3825									75.4297	0.4578
							75.9375	0.3882									75.9375	0.4596
							76.4453	0.394									76.4453	0.4614
							76.9531	0.3998									76.9531	0.4632
							77.4609	0.4057									77.4609	0.4649
							77.9688	0.4115									77.9688	0.4667
							78.4766	0.4174									78.4766	0.4683
							78.9844	0.4233									78.9844	0.47
							79.4922	0.4293									79.4922	0.4716
							80	0.4352									80	0.4733
