# Supplementary material for: Pore mutation N617D in the skeletal muscle DHPR blocks Ca2+ influx due to atypical high-affinity Ca2+ binding
Source: eLife. 2021 Jun 1;10:e63435. doi: 10.7554/eLife.63435 (PMC8184209; doi:10.7554/eLife.63435)
Supplement: Figure 2—source data 1. [file elife-63435-fig2-data1.xlsx]

## Sheet: nc(DHPR)- Figure 2a
nc(DHPR)	Voltage	mean I	Std. Error
10mM Ca2+ + 150 mM TEA+
	-50	0.0299	0.0232
	-40	0.0043295	0.0050917
	-30	-0.0064913	0.0057926
	-20	-0.0114	0.0078016
	-10	-0.0091429	0.0070928
	0	-0.003478	0.0109
	10	0.00062687	0.0178
	20	0.0602	0.0308
	30	0.0483	0.0225
	40	0.0852	0.031
	50	0.1478	0.035
	60	0.2171	0.0432
	70	0.3328	0.0674
	80	0.4322	0.0479
nc(DHPR)
1mM Ca2+ + 150 mM TEA+
	-50	-0.1874	0.0493
	-40	-0.1399	0.042
	-30	-0.0067374	0.0327
	-20	0.6247	0.1297
	-10	1.1569	0.2131
	0	1.6159	0.2092
	10	1.9669	0.2169
	20	2.195	0.2292
	30	2.3765	0.1989
	40	2.618	0.2067
	50	2.8573	0.2217
	60	3.1151	0.1979
	70	3.4096	0.2009
	80	3.6623	0.3374
nc(DHPR)
10mM Ca2+ + 150 mM Na+
	-50	0.001532	0.019
	-40	-0.0093428	0.0082494
	-30	-0.001603	0.0172
	-20	0.1973	0.0847
	-10	0.7739	0.1599
	0	1.4018	0.2337
	10	1.7987	0.284
	20	2.0326	0.3024
	30	2.3514	0.3649
	40	2.6088	0.3811
	50	2.9044	0.3703
	60	3.27	0.4049
	70	3.6442	0.4494
	80	4.1265	0.5022

## Sheet: nc(DHPR)- Figure 2c (outward)
nc(DHPR)	Voltage	mean I	Std. Error
1mM Ca2+ + 150 mM TEA+
(no nifedipine)	-50	-0.2125	0.0484
	-40	-0.0481	0.0768
	-30	0.0598	0.1109
	-20	0.4411	0.1301
	-10	0.731	0.2479
	0	0.9929	0.272
	10	1.0594	0.2835
	20	1.3398	0.2422
	30	1.8183	0.3067
	40	2.0941	0.1527
	50	2.7746	0.3596
	60	3.2435	0.3758
	70	3.2796	0.3834
	80	3.6511	0.425
nc(DHPR)
1mM Ca2+ + 150 mM TEA+
(10 µM nifedipine)	-50	-0.028	0.045
	-40	0.0031084	0.0606
	-30	0.0348	0.0876
	-20	0.3644	0.1019
	-10	0.6034	0.084
	0	0.7558	0.0892
	10	0.9932	0.0977
	20	1.2946	0.129
	30	1.6232	0.1127
	40	2.0922	0.1625
	50	2.5082	0.1726
	60	2.8402	0.2097
	70	3.3481	0.2416
	80	3.7105	0.2345

## Sheet: nc(DHPR)- Figure 2c (inward)
nc(DHPR)	Voltage	mean I	Std. Error
1mM Ca2+ + 150 mM TEA+
(no nifedipine)	-50	-0.1252	0.0404
	-40	-0.4754	0.0467
	-30	-5.5953	1.8636
	-20	-12.0834	1.8022
	-10	-12.8889	1.3904
	0	-12.3409	1.0699
	10	-11.9285	0.9563
	20	-11.3442	0.9078
	30	-10.8093	0.8897
	40	-9.7145	1.1136
	50	-10.2503	1.0021
	60	-9.541	0.9429
	70	-8.9688	0.9844
	80	-8.3279	0.8599
nc(DHPR)
1mM Ca2+ + 150 mM TEA+
(10 µM nifedipine)	-50	-0.0641	0.0608
	-40	-0.4414	0.0697
	-30	-6.6163	1.827
	-20	-14.2038	1.6586
	-10	-14.4471	1.3678
	0	-13.8629	1.1883
	10	-13.3572	1.1993
	20	-12.7037	1.1863
	30	-11.9731	1.1208
	40	-11.2498	1.0421
	50	-10.5732	1.0559
	60	-10.0349	1.0494
	70	-9.5122	0.9761
	80	-8.863	1.027
