# Supplementary material for: Pore mutation N617D in the skeletal muscle DHPR blocks Ca2+ influx due to atypical high-affinity Ca2+ binding
Source: eLife. 2021 Jun 1;10:e63435. doi: 10.7554/eLife.63435 (PMC8184209; doi:10.7554/eLife.63435)
Supplement: Figure 3—source data 1. [file elife-63435-fig3-data1.xlsx]

## Sheet: 0Ca2+
External Ca2+= 0	Voltage	mean I (wt)	Std. Error	IV Fit Parameters	Predicted	Residuals	x-column	y-column			Voltage	mean I (nc(DHPR))	Std. Error	IV Fit Parameters	Predicted	Residuals	x-column	y-column
wt (no BayK)	-50	0.1417	0.0517	0.0665	-0.0175	0.1592	-50	-0.0175		nc(DHPR)	-50	0.122	0.0504	0.0788	-0.0171	0.1391	-50	-0.0171
	-40	-0.1391	0.0365	4.8454	-0.1145	-0.0246	-49.6484	-0.0187			-40	-0.1242	0.0142	5.0978	-0.1026	-0.0216	-49.6484	-0.0182
	-30	-0.6643	0.0605	-23.0275	-0.6234	-0.0409	-49.2969	-0.02			-30	-0.5845	0.0551	-20.4473	-0.5412	-0.0432	-49.2969	-0.0194
	-20	-1.6198	0.2581	18.8667	-1.6847	0.0649	-48.9453	-0.0213			-20	-1.6646	0.1544	21.594	-1.7111	0.0465	-48.9453	-0.0207
	-10	-1.9494	0.4981		-1.7988	-0.1506	-48.5938	-0.0228			-10	-2.2773	0.3551		-2.206	-0.0712	-48.5938	-0.022
	0	-1.2478	0.356		-1.2448	-0.0029401	-48.2422	-0.0244			0	-1.6708	0.303		-1.6717	0.00097744	-48.2422	-0.0235
	10	-0.5386	0.2667		-0.5894	0.0508	-47.8906	-0.0261			10	-0.8397	0.1953		-0.9115	0.0718	-47.8906	-0.025
	20	0.2379	0.1865		0.0754	0.1625	-47.5391	-0.0279			20	-0.1202	0.145		-0.1256	0.0054279	-47.5391	-0.0267
	30	0.7821	0.1256		0.7409	0.0412	-47.1875	-0.0298			30	0.6433	0.1184		0.6625	-0.0193	-47.1875	-0.0284
	40	1.2615	0.1378		1.4064	-0.1449	-46.8359	-0.0319			40	1.4367	0.1783		1.4507	-0.0141	-46.8359	-0.0303
							-46.4844	-0.0341									-46.4844	-0.0323
							-46.1328	-0.0364									-46.1328	-0.0344
							-45.7813	-0.0389									-45.7813	-0.0366
							-45.4297	-0.0416									-45.4297	-0.039
							-45.0781	-0.0445									-45.0781	-0.0416
							-44.7266	-0.0475									-44.7266	-0.0443
							-44.375	-0.0508									-44.375	-0.0472
							-44.0234	-0.0542									-44.0234	-0.0502
							-43.6719	-0.0579									-43.6719	-0.0535
							-43.3203	-0.0619									-43.3203	-0.0569
							-42.9688	-0.0661									-42.9688	-0.0606
							-42.6172	-0.0706									-42.6172	-0.0646
							-42.2656	-0.0753									-42.2656	-0.0687
							-41.9141	-0.0804									-41.9141	-0.0732
							-41.5625	-0.0858									-41.5625	-0.0779
							-41.2109	-0.0916									-41.2109	-0.0829
							-40.8594	-0.0978									-40.8594	-0.0882
							-40.5078	-0.1043									-40.5078	-0.0938
							-40.1563	-0.1113									-40.1563	-0.0998
							-39.8047	-0.1187									-39.8047	-0.1062
							-39.4531	-0.1266									-39.4531	-0.1129
							-39.1016	-0.1349									-39.1016	-0.1201
							-38.75	-0.1438									-38.75	-0.1277
							-38.3984	-0.1533									-38.3984	-0.1358
							-38.0469	-0.1633									-38.0469	-0.1443
							-37.6953	-0.174									-37.6953	-0.1534
							-37.3438	-0.1852									-37.3438	-0.1629
							-36.9922	-0.1972									-36.9922	-0.1731
							-36.6406	-0.2099									-36.6406	-0.1839
							-36.2891	-0.2233									-36.2891	-0.1952
							-35.9375	-0.2375									-35.9375	-0.2073
							-35.5859	-0.2525									-35.5859	-0.22
							-35.2344	-0.2683									-35.2344	-0.2334
							-34.8828	-0.285									-34.8828	-0.2476
							-34.5313	-0.3026									-34.5313	-0.2626
							-34.1797	-0.3212									-34.1797	-0.2784
							-33.8281	-0.3408									-33.8281	-0.2951
							-33.4766	-0.3613									-33.4766	-0.3127
							-33.125	-0.3829									-33.125	-0.3311
							-32.7734	-0.4056									-32.7734	-0.3506
							-32.4219	-0.4293									-32.4219	-0.371
							-32.0703	-0.4541									-32.0703	-0.3925
							-31.7188	-0.4801									-31.7188	-0.415
							-31.3672	-0.5072									-31.3672	-0.4386
							-31.0156	-0.5354									-31.0156	-0.4633
							-30.6641	-0.5648									-30.6641	-0.4892
							-30.3125	-0.5953									-30.3125	-0.5162
							-29.9609	-0.627									-29.9609	-0.5444
							-29.6094	-0.6597									-29.6094	-0.5738
							-29.2578	-0.6936									-29.2578	-0.6044
							-28.9063	-0.7284									-28.9063	-0.6363
							-28.5547	-0.7643									-28.5547	-0.6693
							-28.2031	-0.8011									-28.2031	-0.7036
							-27.8516	-0.8388									-27.8516	-0.739
							-27.5	-0.8774									-27.5	-0.7756
							-27.1484	-0.9166									-27.1484	-0.8134
							-26.7969	-0.9565									-26.7969	-0.8523
							-26.4453	-0.997									-26.4453	-0.8923
							-26.0938	-1.0379									-26.0938	-0.9333
							-25.7422	-1.0791									-25.7422	-0.9753
							-25.3906	-1.1205									-25.3906	-1.0182
							-25.0391	-1.162									-25.0391	-1.0619
							-24.6875	-1.2034									-24.6875	-1.1063
							-24.3359	-1.2446									-24.3359	-1.1513
							-23.9844	-1.2855									-23.9844	-1.1969
							-23.6328	-1.3259									-23.6328	-1.2429
							-23.2813	-1.3657									-23.2813	-1.2892
							-22.9297	-1.4048									-22.9297	-1.3357
							-22.5781	-1.443									-22.5781	-1.3822
							-22.2266	-1.4801									-22.2266	-1.4286
							-21.875	-1.5161									-21.875	-1.4748
							-21.5234	-1.5509									-21.5234	-1.5205
							-21.1719	-1.5843									-21.1719	-1.5658
							-20.8203	-1.6162									-20.8203	-1.6104
							-20.4688	-1.6466									-20.4688	-1.6542
							-20.1172	-1.6754									-20.1172	-1.697
							-19.7656	-1.7025									-19.7656	-1.7388
							-19.4141	-1.7279									-19.4141	-1.7793
							-19.0625	-1.7514									-19.0625	-1.8185
							-18.7109	-1.7732									-18.7109	-1.8563
							-18.3594	-1.7931									-18.3594	-1.8926
							-18.0078	-1.8112									-18.0078	-1.9271
							-17.6563	-1.8274									-17.6563	-1.96
							-17.3047	-1.8418									-17.3047	-1.9911
							-16.9531	-1.8544									-16.9531	-2.0203
							-16.6016	-1.8652									-16.6016	-2.0476
							-16.25	-1.8742									-16.25	-2.0729
							-15.8984	-1.8815									-15.8984	-2.0963
							-15.5469	-1.8872									-15.5469	-2.1176
							-15.1953	-1.8912									-15.1953	-2.137
							-14.8438	-1.8936									-14.8438	-2.1543
							-14.4922	-1.8945									-14.4922	-2.1697
							-14.1406	-1.894									-14.1406	-2.183
							-13.7891	-1.8921									-13.7891	-2.1944
							-13.4375	-1.8888									-13.4375	-2.2039
							-13.0859	-1.8843									-13.0859	-2.2116
							-12.7344	-1.8785									-12.7344	-2.2174
							-12.3828	-1.8716									-12.3828	-2.2214
							-12.0313	-1.8636									-12.0313	-2.2236
							-11.6797	-1.8545									-11.6797	-2.2243
							-11.3281	-1.8445									-11.3281	-2.2233
							-10.9766	-1.8336									-10.9766	-2.2207
							-10.625	-1.8218									-10.625	-2.2167
							-10.2734	-1.8091									-10.2734	-2.2112
							-9.9219	-1.7957									-9.9219	-2.2044
							-9.5703	-1.7816									-9.5703	-2.1963
							-9.2188	-1.7668									-9.2188	-2.1869
							-8.8672	-1.7514									-8.8672	-2.1764
							-8.5156	-1.7354									-8.5156	-2.1648
							-8.1641	-1.7189									-8.1641	-2.1521
							-7.8125	-1.7018									-7.8125	-2.1384
							-7.4609	-1.6843									-7.4609	-2.1238
							-7.1094	-1.6663									-7.1094	-2.1083
							-6.7578	-1.6479									-6.7578	-2.092
							-6.4063	-1.6291									-6.4063	-2.0749
							-6.0547	-1.61									-6.0547	-2.057
							-5.7031	-1.5906									-5.7031	-2.0385
							-5.3516	-1.5708									-5.3516	-2.0193
							-5	-1.5507									-5	-1.9995
							-4.6484	-1.5304									-4.6484	-1.9792
							-4.2969	-1.5099									-4.2969	-1.9583
							-3.9453	-1.4891									-3.9453	-1.9369
							-3.5938	-1.4681									-3.5938	-1.9151
							-3.2422	-1.4469									-3.2422	-1.8928
							-2.8906	-1.4256									-2.8906	-1.8701
							-2.5391	-1.4041									-2.5391	-1.8471
							-2.1875	-1.3824									-2.1875	-1.8237
							-1.8359	-1.3606									-1.8359	-1.8
							-1.4844	-1.3386									-1.4844	-1.776
							-1.1328	-1.3166									-1.1328	-1.7517
							-0.7813	-1.2944									-0.7813	-1.7271
							-0.4297	-1.2722									-0.4297	-1.7023
							-0.0781	-1.2498									-0.0781	-1.6773
							0.2734	-1.2273									0.2734	-1.6521
							0.625	-1.2048									0.625	-1.6267
							0.9766	-1.1822									0.9766	-1.6011
							1.3281	-1.1596									1.3281	-1.5753
							1.6797	-1.1368									1.6797	-1.5494
							2.0313	-1.1141									2.0313	-1.5234
							2.3828	-1.0912									2.3828	-1.4972
							2.7344	-1.0683									2.7344	-1.4709
							3.0859	-1.0454									3.0859	-1.4445
							3.4375	-1.0225									3.4375	-1.418
							3.7891	-0.9995									3.7891	-1.3914
							4.1406	-0.9764									4.1406	-1.3647
							4.4922	-0.9533									4.4922	-1.3379
							4.8438	-0.9303									4.8438	-1.311
							5.1953	-0.9071									5.1953	-1.2841
							5.5469	-0.884									5.5469	-1.2571
							5.8984	-0.8608									5.8984	-1.2301
							6.25	-0.8376									6.25	-1.203
							6.6016	-0.8144									6.6016	-1.1759
							6.9531	-0.7912									6.9531	-1.1487
							7.3047	-0.768									7.3047	-1.1214
							7.6563	-0.7447									7.6563	-1.0941
							8.0078	-0.7215									8.0078	-1.0668
							8.3594	-0.6982									8.3594	-1.0395
							8.7109	-0.6749									8.7109	-1.0121
							9.0625	-0.6516									9.0625	-0.9847
							9.4141	-0.6283									9.4141	-0.9573
							9.7656	-0.605									9.7656	-0.9298
							10.1172	-0.5816									10.1172	-0.9023
							10.4688	-0.5583									10.4688	-0.8748
							10.8203	-0.535									10.8203	-0.8473
							11.1719	-0.5116									11.1719	-0.8198
							11.5234	-0.4883									11.5234	-0.7923
							11.875	-0.4649									11.875	-0.7647
							12.2266	-0.4416									12.2266	-0.7371
							12.5781	-0.4182									12.5781	-0.7095
							12.9297	-0.3949									12.9297	-0.6819
							13.2813	-0.3715									13.2813	-0.6543
							13.6328	-0.3481									13.6328	-0.6267
							13.9844	-0.3248									13.9844	-0.5991
							14.3359	-0.3014									14.3359	-0.5714
							14.6875	-0.278									14.6875	-0.5438
							15.0391	-0.2546									15.0391	-0.5162
							15.3906	-0.2312									15.3906	-0.4885
							15.7422	-0.2079									15.7422	-0.4608
							16.0938	-0.1845									16.0938	-0.4332
							16.4453	-0.1611									16.4453	-0.4055
							16.7969	-0.1377									16.7969	-0.3778
							17.1484	-0.1143									17.1484	-0.3502
							17.5	-0.0909									17.5	-0.3225
							17.8516	-0.0675									17.8516	-0.2948
							18.2031	-0.0441									18.2031	-0.2671
							18.5547	-0.0208									18.5547	-0.2394
							18.9063	0.0026339									18.9063	-0.2117
							19.2578	0.026									19.2578	-0.1841
							19.6094	0.0494									19.6094	-0.1564
							19.9609	0.0728									19.9609	-0.1287
							20.3125	0.0962									20.3125	-0.101
							20.6641	0.1196									20.6641	-0.0733
							21.0156	0.143									21.0156	-0.0456
							21.3672	0.1664									21.3672	-0.0179
							21.7188	0.1898									21.7188	0.0098339
							22.0703	0.2132									22.0703	0.0375
							22.4219	0.2366									22.4219	0.0652
							22.7734	0.26									22.7734	0.0929
							23.125	0.2834									23.125	0.1207
							23.4766	0.3068									23.4766	0.1484
							23.8281	0.3302									23.8281	0.1761
							24.1797	0.3536									24.1797	0.2038
							24.5313	0.377									24.5313	0.2315
							24.8828	0.4003									24.8828	0.2592
							25.2344	0.4237									25.2344	0.2869
							25.5859	0.4471									25.5859	0.3146
							25.9375	0.4705									25.9375	0.3423
							26.2891	0.4939									26.2891	0.37
							26.6406	0.5173									26.6406	0.3977
							26.9922	0.5407									26.9922	0.4254
							27.3438	0.5641									27.3438	0.4532
							27.6953	0.5875									27.6953	0.4809
							28.0469	0.6109									28.0469	0.5086
							28.3984	0.6343									28.3984	0.5363
							28.75	0.6577									28.75	0.564
							29.1016	0.6811									29.1016	0.5917
							29.4531	0.7045									29.4531	0.6194
							29.8047	0.7279									29.8047	0.6471
							30.1563	0.7513									30.1563	0.6748
							30.5078	0.7747									30.5078	0.7025
							30.8594	0.7981									30.8594	0.7303
							31.2109	0.8215									31.2109	0.758
							31.5625	0.8449									31.5625	0.7857
							31.9141	0.8683									31.9141	0.8134
							32.2656	0.8917									32.2656	0.8411
							32.6172	0.9151									32.6172	0.8688
							32.9688	0.9385									32.9688	0.8965
							33.3203	0.9619									33.3203	0.9242
							33.6719	0.9853									33.6719	0.9519
							34.0234	1.0087									34.0234	0.9797
							34.375	1.0321									34.375	1.0074
							34.7266	1.0555									34.7266	1.0351
							35.0781	1.0788									35.0781	1.0628
							35.4297	1.1022									35.4297	1.0905
							35.7813	1.1256									35.7813	1.1182
							36.1328	1.149									36.1328	1.1459
							36.4844	1.1724									36.4844	1.1736
							36.8359	1.1958									36.8359	1.2013
							37.1875	1.2192									37.1875	1.2291
							37.5391	1.2426									37.5391	1.2568
							37.8906	1.266									37.8906	1.2845
							38.2422	1.2894									38.2422	1.3122
							38.5938	1.3128									38.5938	1.3399
							38.9453	1.3362									38.9453	1.3676
							39.2969	1.3596									39.2969	1.3953
							39.6484	1.383									39.6484	1.423
							40	1.4064									40	1.4507

## Sheet: Ca2+=1uM
External Ca2+=1mM	Voltage	mean I (wt)	Std. Error	IV Fit Parameters	Predicted	Residuals	x-column	y-column			Voltage	mean I (nc(DHPR))	Std. Error	IV Fit Parameters	Predicted	Residuals	x-column	y-column
wt (no BayK)	-50	0.1563	0.0725	0.0667	-0.0093435	0.1657	-50	-0.0093435		nc(DHPR)	-50	0.0331	0.0138	0.0458	-0.0365	0.0696	-50	-0.0365
	-40	-0.0341	0.0377	4.399	-0.075	0.0409	-49.6484	-0.0101			-40	-0.0649	0.0313	10.7079	-0.0763	0.0114	-49.6484	-0.0375
	-30	-0.5292	0.1539	-23.0976	-0.5009	-0.0284	-49.2969	-0.0108			-30	-0.1026	0.0401	-3.5446	-0.1494	0.0467	-49.2969	-0.0385
	-20	-1.4816	0.2664	13.5609	-1.4982	0.0165	-48.9453	-0.0117			-20	-0.2855	0.073	11.86	-0.2582	-0.0274	-48.9453	-0.0395
	-10	-1.51	0.317		-1.4957	-0.0143	-48.5938	-0.0126			-10	-0.4274	0.0952		-0.3539	-0.0735	-48.5938	-0.0406
	0	-0.8886	0.3075		-0.9	0.0114	-48.2422	-0.0135			0	-0.2506	0.1139		-0.316	0.0654	-48.2422	-0.0417
	10	-0.2188	0.3092		-0.2374	0.0187	-47.8906	-0.0146			10	-0.005083	0.1179		-0.0664	0.0613	-47.8906	-0.0428
	20	0.4218	0.318		0.4296	-0.0077286	-47.5391	-0.0157			20	0.2827	0.1231		0.3354	-0.0528	-47.5391	-0.044
	30	1.0362	0.3037		1.0968	-0.0606	-47.1875	-0.0169			30	0.7144	0.1687		0.7957	-0.0813	-47.1875	-0.0451
	40	1.8083	0.4007		1.7639	0.0444	-46.8359	-0.0182			40	1.3332	0.1709		1.2665	0.0667	-46.8359	-0.0463
							-46.4844	-0.0196									-46.4844	-0.0476
							-46.1328	-0.0211									-46.1328	-0.0488
							-45.7813	-0.0227									-45.7813	-0.0501
							-45.4297	-0.0244									-45.4297	-0.0514
							-45.0781	-0.0263									-45.0781	-0.0528
							-44.7266	-0.0283									-44.7266	-0.0542
							-44.375	-0.0304									-44.375	-0.0556
							-44.0234	-0.0327									-44.0234	-0.0571
							-43.6719	-0.0352									-43.6719	-0.0586
							-43.3203	-0.0379									-43.3203	-0.0601
							-42.9688	-0.0407									-42.9688	-0.0616
							-42.6172	-0.0438									-42.6172	-0.0632
							-42.2656	-0.0471									-42.2656	-0.0649
							-41.9141	-0.0507									-41.9141	-0.0665
							-41.5625	-0.0545									-41.5625	-0.0683
							-41.2109	-0.0586									-41.2109	-0.07
							-40.8594	-0.0629									-40.8594	-0.0718
							-40.5078	-0.0676									-40.5078	-0.0736
							-40.1563	-0.0727									-40.1563	-0.0755
							-39.8047	-0.0781									-39.8047	-0.0774
							-39.4531	-0.0838									-39.4531	-0.0794
							-39.1016	-0.09									-39.1016	-0.0814
							-38.75	-0.0967									-38.75	-0.0834
							-38.3984	-0.1038									-38.3984	-0.0855
							-38.0469	-0.1114									-38.0469	-0.0876
							-37.6953	-0.1195									-37.6953	-0.0898
							-37.3438	-0.1282									-37.3438	-0.092
							-36.9922	-0.1375									-36.9922	-0.0942
							-36.6406	-0.1474									-36.6406	-0.0966
							-36.2891	-0.1579									-36.2891	-0.0989
							-35.9375	-0.1692									-35.9375	-0.1013
							-35.5859	-0.1812									-35.5859	-0.1038
							-35.2344	-0.194									-35.2344	-0.1063
							-34.8828	-0.2076									-34.8828	-0.1088
							-34.5313	-0.222									-34.5313	-0.1114
							-34.1797	-0.2374									-34.1797	-0.1141
							-33.8281	-0.2536									-33.8281	-0.1168
							-33.4766	-0.2709									-33.4766	-0.1195
							-33.125	-0.2892									-33.125	-0.1223
							-32.7734	-0.3085									-32.7734	-0.1251
							-32.4219	-0.3289									-32.4219	-0.128
							-32.0703	-0.3504									-32.0703	-0.131
							-31.7188	-0.373									-31.7188	-0.134
							-31.3672	-0.3969									-31.3672	-0.137
							-31.0156	-0.4219									-31.0156	-0.1401
							-30.6641	-0.4481									-30.6641	-0.1433
							-30.3125	-0.4755									-30.3125	-0.1465
							-29.9609	-0.5041									-29.9609	-0.1497
							-29.6094	-0.5339									-29.6094	-0.153
							-29.2578	-0.5649									-29.2578	-0.1564
							-28.9063	-0.5971									-28.9063	-0.1598
							-28.5547	-0.6304									-28.5547	-0.1632
							-28.2031	-0.6647									-28.2031	-0.1667
							-27.8516	-0.7001									-27.8516	-0.1702
							-27.5	-0.7363									-27.5	-0.1738
							-27.1484	-0.7735									-27.1484	-0.1774
							-26.7969	-0.8114									-26.7969	-0.1811
							-26.4453	-0.8499									-26.4453	-0.1848
							-26.0938	-0.889									-26.0938	-0.1886
							-25.7422	-0.9284									-25.7422	-0.1924
							-25.3906	-0.9682									-25.3906	-0.1962
							-25.0391	-1.008									-25.0391	-0.2001
							-24.6875	-1.0478									-24.6875	-0.204
							-24.3359	-1.0874									-24.3359	-0.2079
							-23.9844	-1.1266									-23.9844	-0.2119
							-23.6328	-1.1653									-23.6328	-0.2159
							-23.2813	-1.2033									-23.2813	-0.2199
							-22.9297	-1.2405									-22.9297	-0.2239
							-22.5781	-1.2766									-22.5781	-0.228
							-22.2266	-1.3116									-22.2266	-0.2321
							-21.875	-1.3453									-21.875	-0.2362
							-21.5234	-1.3776									-21.5234	-0.2403
							-21.1719	-1.4083									-21.1719	-0.2444
							-20.8203	-1.4373									-20.8203	-0.2485
							-20.4688	-1.4646									-20.4688	-0.2527
							-20.1172	-1.4901									-20.1172	-0.2568
							-19.7656	-1.5137									-19.7656	-0.2609
							-19.4141	-1.5354									-19.4141	-0.265
							-19.0625	-1.5551									-19.0625	-0.2691
							-18.7109	-1.5728									-18.7109	-0.2732
							-18.3594	-1.5886									-18.3594	-0.2773
							-18.0078	-1.6024									-18.0078	-0.2813
							-17.6563	-1.6142									-17.6563	-0.2853
							-17.3047	-1.6241									-17.3047	-0.2893
							-16.9531	-1.632									-16.9531	-0.2932
							-16.6016	-1.6382									-16.6016	-0.2971
							-16.25	-1.6426									-16.25	-0.301
							-15.8984	-1.6452									-15.8984	-0.3047
							-15.5469	-1.6462									-15.5469	-0.3085
							-15.1953	-1.6455									-15.1953	-0.3121
							-14.8438	-1.6434									-14.8438	-0.3157
							-14.4922	-1.6398									-14.4922	-0.3192
							-14.1406	-1.6348									-14.1406	-0.3226
							-13.7891	-1.6285									-13.7891	-0.3259
							-13.4375	-1.6209									-13.4375	-0.3291
							-13.0859	-1.6122									-13.0859	-0.3322
							-12.7344	-1.6024									-12.7344	-0.3352
							-12.3828	-1.5916									-12.3828	-0.3381
							-12.0313	-1.5798									-12.0313	-0.3408
							-11.6797	-1.5671									-11.6797	-0.3434
							-11.3281	-1.5535									-11.3281	-0.3459
							-10.9766	-1.5392									-10.9766	-0.3483
							-10.625	-1.5241									-10.625	-0.3505
							-10.2734	-1.5084									-10.2734	-0.3525
							-9.9219	-1.4921									-9.9219	-0.3543
							-9.5703	-1.4751									-9.5703	-0.356
							-9.2188	-1.4576									-9.2188	-0.3576
							-8.8672	-1.4397									-8.8672	-0.3589
							-8.5156	-1.4212									-8.5156	-0.36
							-8.1641	-1.4024									-8.1641	-0.361
							-7.8125	-1.3831									-7.8125	-0.3617
							-7.4609	-1.3635									-7.4609	-0.3623
							-7.1094	-1.3436									-7.1094	-0.3626
							-6.7578	-1.3234									-6.7578	-0.3627
							-6.4063	-1.3028									-6.4063	-0.3626
							-6.0547	-1.2821									-6.0547	-0.3622
							-5.7031	-1.2611									-5.7031	-0.3616
							-5.3516	-1.2398									-5.3516	-0.3608
							-5	-1.2184									-5	-0.3597
							-4.6484	-1.1968									-4.6484	-0.3584
							-4.2969	-1.1751									-4.2969	-0.3568
							-3.9453	-1.1531									-3.9453	-0.355
							-3.5938	-1.1311									-3.5938	-0.3529
							-3.2422	-1.1089									-3.2422	-0.3506
							-2.8906	-1.0866									-2.8906	-0.3479
							-2.5391	-1.0642									-2.5391	-0.3451
							-2.1875	-1.0417									-2.1875	-0.3419
							-1.8359	-1.0191									-1.8359	-0.3385
							-1.4844	-0.9965									-1.4844	-0.3347
							-1.1328	-0.9737									-1.1328	-0.3308
							-0.7813	-0.9509									-0.7813	-0.3265
							-0.4297	-0.928									-0.4297	-0.3219
							-0.0781	-0.9051									-0.0781	-0.3171
							0.2734	-0.8822									0.2734	-0.312
							0.625	-0.8591									0.625	-0.3066
							0.9766	-0.8361									0.9766	-0.3009
							1.3281	-0.813									1.3281	-0.295
							1.6797	-0.7899									1.6797	-0.2888
							2.0313	-0.7667									2.0313	-0.2823
							2.3828	-0.7435									2.3828	-0.2755
							2.7344	-0.7203									2.7344	-0.2684
							3.0859	-0.697									3.0859	-0.2611
							3.4375	-0.6738									3.4375	-0.2535
							3.7891	-0.6505									3.7891	-0.2456
							4.1406	-0.6272									4.1406	-0.2375
							4.4922	-0.6039									4.4922	-0.2291
							4.8438	-0.5806									4.8438	-0.2205
							5.1953	-0.5572									5.1953	-0.2116
							5.5469	-0.5339									5.5469	-0.2024
							5.8984	-0.5105									5.8984	-0.193
							6.25	-0.4871									6.25	-0.1834
							6.6016	-0.4638									6.6016	-0.1735
							6.9531	-0.4404									6.9531	-0.1633
							7.3047	-0.417									7.3047	-0.153
							7.6563	-0.3936									7.6563	-0.1424
							8.0078	-0.3702									8.0078	-0.1316
							8.3594	-0.3468									8.3594	-0.1206
							8.7109	-0.3233									8.7109	-0.1093
							9.0625	-0.2999									9.0625	-0.0979
							9.4141	-0.2765									9.4141	-0.0863
							9.7656	-0.2531									9.7656	-0.0744
							10.1172	-0.2296									10.1172	-0.0624
							10.4688	-0.2062									10.4688	-0.0501
							10.8203	-0.1828									10.8203	-0.0377
							11.1719	-0.1593									11.1719	-0.0251
							11.5234	-0.1359									11.5234	-0.0124
							11.875	-0.1124									11.875	0.0005536
							12.2266	-0.089									12.2266	0.0136
							12.5781	-0.0655									12.5781	0.0269
							12.9297	-0.0421									12.9297	0.0403
							13.2813	-0.0187									13.2813	0.0539
							13.6328	0.0047987									13.6328	0.0676
							13.9844	0.0282									13.9844	0.0814
							14.3359	0.0517									14.3359	0.0954
							14.6875	0.0752									14.6875	0.1095
							15.0391	0.0986									15.0391	0.1237
							15.3906	0.1221									15.3906	0.1381
							15.7422	0.1455									15.7422	0.1525
							16.0938	0.169									16.0938	0.1671
							16.4453	0.1924									16.4453	0.1818
							16.7969	0.2159									16.7969	0.1966
							17.1484	0.2393									17.1484	0.2115
							17.5	0.2628									17.5	0.2265
							17.8516	0.2862									17.8516	0.2415
							18.2031	0.3097									18.2031	0.2567
							18.5547	0.3331									18.5547	0.2719
							18.9063	0.3566									18.9063	0.2873
							19.2578	0.3801									19.2578	0.3027
							19.6094	0.4035									19.6094	0.3182
							19.9609	0.427									19.9609	0.3337
							20.3125	0.4504									20.3125	0.3493
							20.6641	0.4739									20.6641	0.365
							21.0156	0.4973									21.0156	0.3807
							21.3672	0.5208									21.3672	0.3965
							21.7188	0.5442									21.7188	0.4124
							22.0703	0.5677									22.0703	0.4283
							22.4219	0.5912									22.4219	0.4442
							22.7734	0.6146									22.7734	0.4602
							23.125	0.6381									23.125	0.4762
							23.4766	0.6615									23.4766	0.4923
							23.8281	0.685									23.8281	0.5084
							24.1797	0.7084									24.1797	0.5246
							24.5313	0.7319									24.5313	0.5408
							24.8828	0.7554									24.8828	0.557
							25.2344	0.7788									25.2344	0.5733
							25.5859	0.8023									25.5859	0.5895
							25.9375	0.8257									25.9375	0.6058
							26.2891	0.8492									26.2891	0.6222
							26.6406	0.8726									26.6406	0.6385
							26.9922	0.8961									26.9922	0.6549
							27.3438	0.9195									27.3438	0.6713
							27.6953	0.943									27.6953	0.6877
							28.0469	0.9665									28.0469	0.7042
							28.3984	0.9899									28.3984	0.7206
							28.75	1.0134									28.75	0.7371
							29.1016	1.0368									29.1016	0.7536
							29.4531	1.0603									29.4531	0.7701
							29.8047	1.0837									29.8047	0.7866
							30.1563	1.1072									30.1563	0.8031
							30.5078	1.1306									30.5078	0.8196
							30.8594	1.1541									30.8594	0.8361
							31.2109	1.1776									31.2109	0.8527
							31.5625	1.201									31.5625	0.8692
							31.9141	1.2245									31.9141	0.8858
							32.2656	1.2479									32.2656	0.9023
							32.6172	1.2714									32.6172	0.9189
							32.9688	1.2948									32.9688	0.9354
							33.3203	1.3183									33.3203	0.952
							33.6719	1.3417									33.6719	0.9686
							34.0234	1.3652									34.0234	0.9851
							34.375	1.3887									34.375	1.0017
							34.7266	1.4121									34.7266	1.0183
							35.0781	1.4356									35.0781	1.0348
							35.4297	1.459									35.4297	1.0514
							35.7813	1.4825									35.7813	1.068
							36.1328	1.5059									36.1328	1.0845
							36.4844	1.5294									36.4844	1.1011
							36.8359	1.5528									36.8359	1.1176
							37.1875	1.5763									37.1875	1.1342
							37.5391	1.5998									37.5391	1.1507
							37.8906	1.6232									37.8906	1.1673
							38.2422	1.6467									38.2422	1.1838
							38.5938	1.6701									38.5938	1.2004
							38.9453	1.6936									38.9453	1.2169
							39.2969	1.717									39.2969	1.2335
							39.6484	1.7405									39.6484	1.25
							40	1.7639									40	1.2665

## Sheet: Ca2+=3uM
External Ca2+=1mM	Voltage	mean I (wt)	Std. Error	IV Fit Parameters	Predicted	Residuals	x-column	y-column			Voltage	mean I (nc(DHPR))	Std. Error	IV Fit Parameters	Predicted	Residuals	x-column	y-column
wt (no BayK)	-50	-0.0559	0.0287	0.1042	-0.0916	0.0356	-50	-0.0916		nc(DHPR)	-50	-0.013	0.0255	0.1696	-0.0195	0.0064795	-50	-0.0195
	-40	-0.1575	0.0434	45.5794	-0.0925	-0.065	-49.6484	-0.0917			-40	-0.0277	0.0258	0.0068032	-0.0126	-0.0152	-49.6484	-0.0195
	-30	-0.076	0.0374	136.869	-0.0885	0.0125	-49.2969	-0.0918			-30	0.0171	0.0204	3.9335e-05	0.0123	0.0048295	-49.2969	-0.0196
	-20	-0.0818	0.0533	3.8896	-0.0772	-0.004612	-48.9453	-0.0919			-20	0.0567	0.0142	-4.2199e-07	0.0527	0.0040532	-48.9453	-0.0196
	-10	-0.0466	0.0884		-0.0555	0.0089262	-48.5938	-0.0919			-10	0.1183	0.0292		0.1059	0.0124	-48.5938	-0.0197
	0	0.0098858	0.1		-0.0192	0.0291	-48.2422	-0.092			0	0.1514	0.0557		0.1696	-0.0183	-48.2422	-0.0197
	10	0.0597	0.1288		0.0371	0.0226	-47.8906	-0.0921			10	0.2464	0.0885		0.2412	0.0052654	-47.8906	-0.0196
	20	0.0523	0.1372		0.12	-0.0677	-47.5391	-0.0922			20	0.3179	0.1114		0.318	-0.00018692	-47.5391	-0.0196
	30	0.265	0.1975		0.2381	0.0269	-47.1875	-0.0922			30	0.3986	0.1247		0.3977	0.00085812	-47.1875	-0.0195
	40	0.4038	0.2149		0.4014	0.0023845	-46.8359	-0.0923			40	0.4775	0.1487		0.4777	-0.00021004	-46.8359	-0.0194
							-46.4844	-0.0923									-46.4844	-0.0192
							-46.1328	-0.0924									-46.1328	-0.0191
							-45.7813	-0.0924									-45.7813	-0.0189
							-45.4297	-0.0925									-45.4297	-0.0187
							-45.0781	-0.0925									-45.0781	-0.0185
							-44.7266	-0.0926									-44.7266	-0.0182
							-44.375	-0.0926									-44.375	-0.0179
							-44.0234	-0.0926									-44.0234	-0.0176
							-43.6719	-0.0926									-43.6719	-0.0173
							-43.3203	-0.0926									-43.3203	-0.017
							-42.9688	-0.0927									-42.9688	-0.0166
							-42.6172	-0.0927									-42.6172	-0.0162
							-42.2656	-0.0927									-42.2656	-0.0158
							-41.9141	-0.0927									-41.9141	-0.0154
							-41.5625	-0.0926									-41.5625	-0.0149
							-41.2109	-0.0926									-41.2109	-0.0144
							-40.8594	-0.0926									-40.8594	-0.0139
							-40.5078	-0.0926									-40.5078	-0.0134
							-40.1563	-0.0925									-40.1563	-0.0128
							-39.8047	-0.0925									-39.8047	-0.0122
							-39.4531	-0.0924									-39.4531	-0.0116
							-39.1016	-0.0924									-39.1016	-0.011
							-38.75	-0.0923									-38.75	-0.0104
							-38.3984	-0.0923									-38.3984	-0.0097226
							-38.0469	-0.0922									-38.0469	-0.0090383
							-37.6953	-0.0921									-37.6953	-0.0083323
							-37.3438	-0.092									-37.3438	-0.0076048
							-36.9922	-0.0919									-36.9922	-0.0068559
							-36.6406	-0.0918									-36.6406	-0.0060857
							-36.2891	-0.0917									-36.2891	-0.0052943
							-35.9375	-0.0916									-35.9375	-0.0044818
							-35.5859	-0.0915									-35.5859	-0.0036483
							-35.2344	-0.0914									-35.2344	-0.002794
							-34.8828	-0.0912									-34.8828	-0.001919
							-34.5313	-0.0911									-34.5313	-0.0010232
							-34.1797	-0.0909									-34.1797	-0.00010702
							-33.8281	-0.0908									-33.8281	0.00082963
							-33.4766	-0.0906									-33.4766	0.0017866
							-33.125	-0.0904									-33.125	0.0027638
							-32.7734	-0.0902									-32.7734	0.003761
							-32.4219	-0.0901									-32.4219	0.0047782
							-32.0703	-0.0899									-32.0703	0.0058153
							-31.7188	-0.0896									-31.7188	0.0068722
							-31.3672	-0.0894									-31.3672	0.0079487
							-31.0156	-0.0892									-31.0156	0.0090447
							-30.6641	-0.089									-30.6641	0.0102
							-30.3125	-0.0887									-30.3125	0.0113
							-29.9609	-0.0885									-29.9609	0.0124
							-29.6094	-0.0882									-29.6094	0.0136
							-29.2578	-0.088									-29.2578	0.0148
							-28.9063	-0.0877									-28.9063	0.016
							-28.5547	-0.0874									-28.5547	0.0173
							-28.2031	-0.0871									-28.2031	0.0185
							-27.8516	-0.0868									-27.8516	0.0198
							-27.5	-0.0865									-27.5	0.0211
							-27.1484	-0.0862									-27.1484	0.0224
							-26.7969	-0.0858									-26.7969	0.0237
							-26.4453	-0.0855									-26.4453	0.025
							-26.0938	-0.0851									-26.0938	0.0264
							-25.7422	-0.0848									-25.7422	0.0278
							-25.3906	-0.0844									-25.3906	0.0291
							-25.0391	-0.084									-25.0391	0.0306
							-24.6875	-0.0836									-24.6875	0.032
							-24.3359	-0.0832									-24.3359	0.0334
							-23.9844	-0.0828									-23.9844	0.0349
							-23.6328	-0.0824									-23.6328	0.0364
							-23.2813	-0.0819									-23.2813	0.0379
							-22.9297	-0.0815									-22.9297	0.0394
							-22.5781	-0.081									-22.5781	0.0409
							-22.2266	-0.0805									-22.2266	0.0425
							-21.875	-0.08									-21.875	0.044
							-21.5234	-0.0795									-21.5234	0.0456
							-21.1719	-0.079									-21.1719	0.0472
							-20.8203	-0.0785									-20.8203	0.0488
							-20.4688	-0.078									-20.4688	0.0505
							-20.1172	-0.0774									-20.1172	0.0521
							-19.7656	-0.0769									-19.7656	0.0538
							-19.4141	-0.0763									-19.4141	0.0555
							-19.0625	-0.0757									-19.0625	0.0572
							-18.7109	-0.0751									-18.7109	0.0589
							-18.3594	-0.0745									-18.3594	0.0606
							-18.0078	-0.0739									-18.0078	0.0623
							-17.6563	-0.0732									-17.6563	0.0641
							-17.3047	-0.0726									-17.3047	0.0659
							-16.9531	-0.0719									-16.9531	0.0676
							-16.6016	-0.0712									-16.6016	0.0694
							-16.25	-0.0705									-16.25	0.0713
							-15.8984	-0.0698									-15.8984	0.0731
							-15.5469	-0.0691									-15.5469	0.0749
							-15.1953	-0.0683									-15.1953	0.0768
							-14.8438	-0.0676									-14.8438	0.0787
							-14.4922	-0.0668									-14.4922	0.0806
							-14.1406	-0.066									-14.1406	0.0825
							-13.7891	-0.0652									-13.7891	0.0844
							-13.4375	-0.0644									-13.4375	0.0863
							-13.0859	-0.0635									-13.0859	0.0883
							-12.7344	-0.0627									-12.7344	0.0902
							-12.3828	-0.0618									-12.3828	0.0922
							-12.0313	-0.0609									-12.0313	0.0942
							-11.6797	-0.06									-11.6797	0.0962
							-11.3281	-0.0591									-11.3281	0.0982
							-10.9766	-0.0582									-10.9766	0.1002
							-10.625	-0.0572									-10.625	0.1023
							-10.2734	-0.0563									-10.2734	0.1043
							-9.9219	-0.0553									-9.9219	0.1064
							-9.5703	-0.0543									-9.5703	0.1085
							-9.2188	-0.0532									-9.2188	0.1106
							-8.8672	-0.0522									-8.8672	0.1127
							-8.5156	-0.0511									-8.5156	0.1148
							-8.1641	-0.0501									-8.1641	0.1169
							-7.8125	-0.049									-7.8125	0.1191
							-7.4609	-0.0478									-7.4609	0.1212
							-7.1094	-0.0467									-7.1094	0.1234
							-6.7578	-0.0455									-6.7578	0.1256
							-6.4063	-0.0444									-6.4063	0.1278
							-6.0547	-0.0432									-6.0547	0.13
							-5.7031	-0.042									-5.7031	0.1322
							-5.3516	-0.0407									-5.3516	0.1344
							-5	-0.0395									-5	0.1366
							-4.6484	-0.0382									-4.6484	0.1389
							-4.2969	-0.0369									-4.2969	0.1411
							-3.9453	-0.0356									-3.9453	0.1434
							-3.5938	-0.0342									-3.5938	0.1457
							-3.2422	-0.0328									-3.2422	0.148
							-2.8906	-0.0315									-2.8906	0.1503
							-2.5391	-0.03									-2.5391	0.1526
							-2.1875	-0.0286									-2.1875	0.1549
							-1.8359	-0.0272									-1.8359	0.1573
							-1.4844	-0.0257									-1.4844	0.1596
							-1.1328	-0.0242									-1.1328	0.162
							-0.7813	-0.0227									-0.7813	0.1643
							-0.4297	-0.0211									-0.4297	0.1667
							-0.0781	-0.0195									-0.0781	0.1691
							0.2734	-0.0179									0.2734	0.1715
							0.625	-0.0163									0.625	0.1739
							0.9766	-0.0147									0.9766	0.1763
							1.3281	-0.013									1.3281	0.1787
							1.6797	-0.0113									1.6797	0.1812
							2.0313	-0.0095576									2.0313	0.1836
							2.3828	-0.0078065									2.3828	0.186
							2.7344	-0.0060292									2.7344	0.1885
							3.0859	-0.0042253									3.0859	0.191
							3.4375	-0.0023945									3.4375	0.1935
							3.7891	-0.00053656									3.7891	0.1959
							4.1406	0.0013488									4.1406	0.1984
							4.4922	0.0032618									4.4922	0.2009
							4.8438	0.0052029									4.8438	0.2034
							5.1953	0.0071722									5.1953	0.206
							5.5469	0.0091702									5.5469	0.2085
							5.8984	0.0112									5.8984	0.211
							6.25	0.0133									6.25	0.2136
							6.6016	0.0153									6.6016	0.2161
							6.9531	0.0175									6.9531	0.2187
							7.3047	0.0196									7.3047	0.2212
							7.6563	0.0218									7.6563	0.2238
							8.0078	0.024									8.0078	0.2264
							8.3594	0.0262									8.3594	0.229
							8.7109	0.0285									8.7109	0.2316
							9.0625	0.0308									9.0625	0.2342
							9.4141	0.0331									9.4141	0.2368
							9.7656	0.0355									9.7656	0.2394
							10.1172	0.0379									10.1172	0.242
							10.4688	0.0403									10.4688	0.2447
							10.8203	0.0428									10.8203	0.2473
							11.1719	0.0453									11.1719	0.2499
							11.5234	0.0478									11.5234	0.2526
							11.875	0.0504									11.875	0.2552
							12.2266	0.053									12.2266	0.2579
							12.5781	0.0556									12.5781	0.2606
							12.9297	0.0583									12.9297	0.2632
							13.2813	0.061									13.2813	0.2659
							13.6328	0.0637									13.6328	0.2686
							13.9844	0.0665									13.9844	0.2713
							14.3359	0.0693									14.3359	0.274
							14.6875	0.0722									14.6875	0.2767
							15.0391	0.0751									15.0391	0.2794
							15.3906	0.078									15.3906	0.2821
							15.7422	0.0809									15.7422	0.2848
							16.0938	0.084									16.0938	0.2875
							16.4453	0.087									16.4453	0.2903
							16.7969	0.0901									16.7969	0.293
							17.1484	0.0932									17.1484	0.2957
							17.5	0.0964									17.5	0.2985
							17.8516	0.0996									17.8516	0.3012
							18.2031	0.1028									18.2031	0.3039
							18.5547	0.1061									18.5547	0.3067
							18.9063	0.1094									18.9063	0.3094
							19.2578	0.1128									19.2578	0.3122
							19.6094	0.1162									19.6094	0.315
							19.9609	0.1196									19.9609	0.3177
							20.3125	0.1231									20.3125	0.3205
							20.6641	0.1267									20.6641	0.3233
							21.0156	0.1303									21.0156	0.326
							21.3672	0.1339									21.3672	0.3288
							21.7188	0.1376									21.7188	0.3316
							22.0703	0.1413									22.0703	0.3344
							22.4219	0.145									22.4219	0.3372
							22.7734	0.1489									22.7734	0.34
							23.125	0.1527									23.125	0.3428
							23.4766	0.1566									23.4766	0.3456
							23.8281	0.1606									23.8281	0.3484
							24.1797	0.1646									24.1797	0.3511
							24.5313	0.1686									24.5313	0.354
							24.8828	0.1727									24.8828	0.3568
							25.2344	0.1768									25.2344	0.3596
							25.5859	0.181									25.5859	0.3624
							25.9375	0.1853									25.9375	0.3652
							26.2891	0.1896									26.2891	0.368
							26.6406	0.1939									26.6406	0.3708
							26.9922	0.1983									26.9922	0.3736
							27.3438	0.2028									27.3438	0.3764
							27.6953	0.2073									27.6953	0.3792
							28.0469	0.2118									28.0469	0.3821
							28.3984	0.2164									28.3984	0.3849
							28.75	0.2211									28.75	0.3877
							29.1016	0.2258									29.1016	0.3905
							29.4531	0.2306									29.4531	0.3933
							29.8047	0.2354									29.8047	0.3962
							30.1563	0.2403									30.1563	0.399
							30.5078	0.2452									30.5078	0.4018
							30.8594	0.2502									30.8594	0.4046
							31.2109	0.2552									31.2109	0.4074
							31.5625	0.2603									31.5625	0.4103
							31.9141	0.2655									31.9141	0.4131
							32.2656	0.2707									32.2656	0.4159
							32.6172	0.276									32.6172	0.4187
							32.9688	0.2813									32.9688	0.4215
							33.3203	0.2867									33.3203	0.4244
							33.6719	0.2922									33.6719	0.4272
							34.0234	0.2977									34.0234	0.43
							34.375	0.3033									34.375	0.4328
							34.7266	0.309									34.7266	0.4356
							35.0781	0.3147									35.0781	0.4384
							35.4297	0.3204									35.4297	0.4413
							35.7813	0.3263									35.7813	0.4441
							36.1328	0.3322									36.1328	0.4469
							36.4844	0.3381									36.4844	0.4497
							36.8359	0.3442									36.8359	0.4525
							37.1875	0.3503									37.1875	0.4553
							37.5391	0.3564									37.5391	0.4581
							37.8906	0.3626									37.8906	0.4609
							38.2422	0.3689									38.2422	0.4637
							38.5938	0.3753									38.5938	0.4665
							38.9453	0.3817									38.9453	0.4693
							39.2969	0.3882									39.2969	0.4721
							39.6484	0.3948									39.6484	0.4749
							40	0.4014									40	0.4777

## Sheet: concentration-response curves 
External [Ca2+] (mM)	wt Li+ I/I0			nc(DHPR) Li+ I/I0
	mean	SEM		mean	SEM
0	1			1
0.01	1.0068	0.0915		0.9938	0.0818
0.03				0.9378	0.115
0.1	0.9392	0.1098		0.8548	0.1307
0.3	1.0039	0.078		0.5737	0.1254
1	0.8132	0.1201		0.2013	0.0426
3	0.1171	0.0169		0.0268	0.0085851
10	0.0428	0.0231
30	0.0063875	0.0069475		0.01	0.0067546
