# Supplementary material for: Pore mutation N617D in the skeletal muscle DHPR blocks Ca2+ influx due to atypical high-affinity Ca2+ binding
Source: eLife. 2021 Jun 1;10:e63435. doi: 10.7554/eLife.63435 (PMC8184209; doi:10.7554/eLife.63435)
Supplement: Figure 4—source data 1. [file elife-63435-fig4-data1.xlsx]

## Sheet: IV nc(DHPR) =0 Ca2+,with nif.
nc(DHPR)	Voltage	mean I (nc(DHPR))	Std. Error	IV Fit Parameters	Predicted	Residuals	x-column	y-column		nc(DHPR)	Voltage	mean I (nc(DHPR))	Std. Error	IV Fit Parameters	Predicted	Residuals	x-column	y-column
External Ca2+ = 0										External Ca2+ = 0
(no nifedipine)	-50	0.0279	0.0198	0.0785	-0.0149	0.0428	-50	-0.0149		(10 µM nifedipine)	-50	0.0233	0.008941	0.0172	-0.0033597	0.0266	-50	-0.0033597
	-40	-0.1334	0.0612	4.5436	-0.1129	-0.0205	-49.6484	-0.016			-40	-0.0307	0.0119	5.3675	-0.0177	-0.013	-49.6484	-0.003565
	-30	-0.7246	0.2386	-23.2083	-0.7099	-0.0148	-49.2969	-0.0172			-30	-0.0777	0.0277	-19.3498	-0.0815	0.0038332	-49.2969	-0.0037827
	-20	-2.0386	0.3222	19.3735	-2.0688	0.0302	-48.9453	-0.0185			-20	-0.2382	0.0967	9.2346	-0.236	-0.0022077	-48.9453	-0.0040135
	-10	-2.2688	0.206		-2.1857	-0.0831	-48.5938	-0.0199			-10	-0.2767	0.144		-0.2813	0.0045315	-48.5938	-0.0042581
	0	-1.607	0.1522		-1.5112	-0.0958	-48.2422	-0.0214			0	-0.1665	0.1161		-0.1545	-0.0121	-48.2422	-0.0045174
	10	-0.6938	0.1797		-0.7351	0.0413	-47.8906	-0.023			10	0.017	0.0774		0.0131	0.0039262	-47.8906	-0.0047922
	20	0.3326	0.2301		0.0492	0.2834	-47.5391	-0.0247			20	0.1857	0.0582		0.1849	0.0008558	-47.5391	-0.0050834
	30	0.8187	0.1229		0.8339	-0.0152	-47.1875	-0.0265			30	0.3754	0.0733		0.3568	0.0186	-47.1875	-0.005392
	40	1.4661	0.1577		1.6187	-0.1526	-46.8359	-0.0285			40	0.5139	0.1112		0.5287	-0.0147	-46.8359	-0.005719
							-46.4844	-0.0306									-46.4844	-0.0060654
							-46.1328	-0.0329									-46.1328	-0.0064323
							-45.7813	-0.0353									-45.7813	-0.006821
							-45.4297	-0.0379									-45.4297	-0.0072327
							-45.0781	-0.0407									-45.0781	-0.0076686
							-44.7266	-0.0438									-44.7266	-0.0081302
							-44.375	-0.047									-44.375	-0.0086188
							-44.0234	-0.0504									-44.0234	-0.0091361
							-43.6719	-0.0542									-43.6719	-0.0096836
							-43.3203	-0.0581									-43.3203	-0.0103
							-42.9688	-0.0624									-42.9688	-0.0109
							-42.6172	-0.067									-42.6172	-0.0115
							-42.2656	-0.0719									-42.2656	-0.0122
							-41.9141	-0.0771									-41.9141	-0.0129
							-41.5625	-0.0827									-41.5625	-0.0137
							-41.2109	-0.0887									-41.2109	-0.0145
							-40.8594	-0.0952									-40.8594	-0.0154
							-40.5078	-0.1021									-40.5078	-0.0163
							-40.1563	-0.1095									-40.1563	-0.0172
							-39.8047	-0.1173									-39.8047	-0.0182
							-39.4531	-0.1258									-39.4531	-0.0193
							-39.1016	-0.1348									-39.1016	-0.0204
							-38.75	-0.1444									-38.75	-0.0216
							-38.3984	-0.1547									-38.3984	-0.0229
							-38.0469	-0.1657									-38.0469	-0.0242
							-37.6953	-0.1774									-37.6953	-0.0256
							-37.3438	-0.1898									-37.3438	-0.0271
							-36.9922	-0.2032									-36.9922	-0.0286
							-36.6406	-0.2173									-36.6406	-0.0302
							-36.2891	-0.2324									-36.2891	-0.032
							-35.9375	-0.2485									-35.9375	-0.0338
							-35.5859	-0.2655									-35.5859	-0.0357
							-35.2344	-0.2836									-35.2344	-0.0377
							-34.8828	-0.3029									-34.8828	-0.0398
							-34.5313	-0.3233									-34.5313	-0.042
							-34.1797	-0.3449									-34.1797	-0.0443
							-33.8281	-0.3677									-33.8281	-0.0467
							-33.4766	-0.3919									-33.4766	-0.0493
							-33.125	-0.4175									-33.125	-0.0519
							-32.7734	-0.4444									-32.7734	-0.0547
							-32.4219	-0.4728									-32.4219	-0.0576
							-32.0703	-0.5026									-32.0703	-0.0607
							-31.7188	-0.534									-31.7188	-0.0639
							-31.3672	-0.5669									-31.3672	-0.0672
							-31.0156	-0.6014									-31.0156	-0.0707
							-30.6641	-0.6375									-30.6641	-0.0743
							-30.3125	-0.6751									-30.3125	-0.078
							-29.9609	-0.7143									-29.9609	-0.0819
							-29.6094	-0.755									-29.6094	-0.086
							-29.2578	-0.7973									-29.2578	-0.0902
							-28.9063	-0.8411									-28.9063	-0.0945
							-28.5547	-0.8863									-28.5547	-0.099
							-28.2031	-0.9329									-28.2031	-0.1037
							-27.8516	-0.9808									-27.8516	-0.1085
							-27.5	-1.0299									-27.5	-0.1134
							-27.1484	-1.0801									-27.1484	-0.1185
							-26.7969	-1.1312									-26.7969	-0.1237
							-26.4453	-1.1832									-26.4453	-0.1291
							-26.0938	-1.2359									-26.0938	-0.1345
							-25.7422	-1.289									-25.7422	-0.1401
							-25.3906	-1.3426									-25.3906	-0.1458
							-25.0391	-1.3962									-25.0391	-0.1516
							-24.6875	-1.4499									-24.6875	-0.1574
							-24.3359	-1.5033									-24.3359	-0.1633
							-23.9844	-1.5563									-23.9844	-0.1693
							-23.6328	-1.6087									-23.6328	-0.1753
							-23.2813	-1.6602									-23.2813	-0.1814
							-22.9297	-1.7108									-22.9297	-0.1875
							-22.5781	-1.7601									-22.5781	-0.1935
							-22.2266	-1.808									-22.2266	-0.1996
							-21.875	-1.8543									-21.875	-0.2056
							-21.5234	-1.8989									-21.5234	-0.2115
							-21.1719	-1.9416									-21.1719	-0.2173
							-20.8203	-1.9823									-20.8203	-0.2231
							-20.4688	-2.0209									-20.4688	-0.2287
							-20.1172	-2.0572									-20.1172	-0.2342
							-19.7656	-2.0912									-19.7656	-0.2395
							-19.4141	-2.1229									-19.4141	-0.2447
							-19.0625	-2.1521									-19.0625	-0.2496
							-18.7109	-2.1789									-18.7109	-0.2544
							-18.3594	-2.2033									-18.3594	-0.2589
							-18.0078	-2.2251									-18.0078	-0.2632
							-17.6563	-2.2446									-17.6563	-0.2672
							-17.3047	-2.2616									-17.3047	-0.2709
							-16.9531	-2.2762									-16.9531	-0.2744
							-16.6016	-2.2885									-16.6016	-0.2776
							-16.25	-2.2986									-16.25	-0.2805
							-15.8984	-2.3064									-15.8984	-0.2831
							-15.5469	-2.3121									-15.5469	-0.2853
							-15.1953	-2.3158									-15.1953	-0.2873
							-14.8438	-2.3175									-14.8438	-0.289
							-14.4922	-2.3173									-14.4922	-0.2903
							-14.1406	-2.3154									-14.1406	-0.2913
							-13.7891	-2.3117									-13.7891	-0.292
							-13.4375	-2.3063									-13.4375	-0.2924
							-13.0859	-2.2995									-13.0859	-0.2925
							-12.7344	-2.2912									-12.7344	-0.2923
							-12.3828	-2.2815									-12.3828	-0.2918
							-12.0313	-2.2705									-12.0313	-0.291
							-11.6797	-2.2583									-11.6797	-0.2899
							-11.3281	-2.245									-11.3281	-0.2886
							-10.9766	-2.2306									-10.9766	-0.287
							-10.625	-2.2153									-10.625	-0.2851
							-10.2734	-2.199									-10.2734	-0.2831
							-9.9219	-2.1818									-9.9219	-0.2807
							-9.5703	-2.1638									-9.5703	-0.2782
							-9.2188	-2.1451									-9.2188	-0.2754
							-8.8672	-2.1257									-8.8672	-0.2724
							-8.5156	-2.1056									-8.5156	-0.2692
							-8.1641	-2.085									-8.1641	-0.2659
							-7.8125	-2.0638									-7.8125	-0.2624
							-7.4609	-2.042									-7.4609	-0.2587
							-7.1094	-2.0199									-7.1094	-0.2548
							-6.7578	-1.9972									-6.7578	-0.2508
							-6.4063	-1.9742									-6.4063	-0.2467
							-6.0547	-1.9508									-6.0547	-0.2424
							-5.7031	-1.927									-5.7031	-0.238
							-5.3516	-1.9029									-5.3516	-0.2334
							-5	-1.8786									-5	-0.2288
							-4.6484	-1.8539									-4.6484	-0.2241
							-4.2969	-1.8291									-4.2969	-0.2193
							-3.9453	-1.804									-3.9453	-0.2143
							-3.5938	-1.7786									-3.5938	-0.2093
							-3.2422	-1.7531									-3.2422	-0.2042
							-2.8906	-1.7275									-2.8906	-0.1991
							-2.5391	-1.7016									-2.5391	-0.1939
							-2.1875	-1.6756									-2.1875	-0.1886
							-1.8359	-1.6495									-1.8359	-0.1832
							-1.4844	-1.6232									-1.4844	-0.1778
							-1.1328	-1.5969									-1.1328	-0.1724
							-0.7813	-1.5704									-0.7813	-0.1669
							-0.4297	-1.5438									-0.4297	-0.1613
							-0.0781	-1.5171									-0.0781	-0.1557
							0.2734	-1.4904									0.2734	-0.1501
							0.625	-1.4636									0.625	-0.1445
							0.9766	-1.4367									0.9766	-0.1388
							1.3281	-1.4098									1.3281	-0.133
							1.6797	-1.3828									1.6797	-0.1273
							2.0313	-1.3557									2.0313	-0.1215
							2.3828	-1.3286									2.3828	-0.1157
							2.7344	-1.3015									2.7344	-0.1099
							3.0859	-1.2743									3.0859	-0.1041
							3.4375	-1.2471									3.4375	-0.0982
							3.7891	-1.2198									3.7891	-0.0923
							4.1406	-1.1925									4.1406	-0.0864
							4.4922	-1.1652									4.4922	-0.0805
							4.8438	-1.1379									4.8438	-0.0746
							5.1953	-1.1105									5.1953	-0.0687
							5.5469	-1.0831									5.5469	-0.0628
							5.8984	-1.0557									5.8984	-0.0568
							6.25	-1.0283									6.25	-0.0509
							6.6016	-1.0009									6.6016	-0.0449
							6.9531	-0.9734									6.9531	-0.0389
							7.3047	-0.946									7.3047	-0.0329
							7.6563	-0.9185									7.6563	-0.0269
							8.0078	-0.891									8.0078	-0.021
							8.3594	-0.8635									8.3594	-0.015
							8.7109	-0.836									8.7109	-0.0089511
							9.0625	-0.8085									9.0625	-0.0029431
							9.4141	-0.781									9.4141	0.003069
							9.7656	-0.7535									9.7656	0.0090847
							10.1172	-0.7259									10.1172	0.0151
							10.4688	-0.6984									10.4688	0.0211
							10.8203	-0.6708									10.8203	0.0272
							11.1719	-0.6433									11.1719	0.0332
							11.5234	-0.6157									11.5234	0.0392
							11.875	-0.5882									11.875	0.0452
							12.2266	-0.5606									12.2266	0.0513
							12.5781	-0.5331									12.5781	0.0573
							12.9297	-0.5055									12.9297	0.0633
							13.2813	-0.4779									13.2813	0.0694
							13.6328	-0.4504									13.6328	0.0754
							13.9844	-0.4228									13.9844	0.0815
							14.3359	-0.3952									14.3359	0.0875
							14.6875	-0.3676									14.6875	0.0935
							15.0391	-0.3401									15.0391	0.0996
							15.3906	-0.3125									15.3906	0.1056
							15.7422	-0.2849									15.7422	0.1117
							16.0938	-0.2573									16.0938	0.1177
							16.4453	-0.2298									16.4453	0.1238
							16.7969	-0.2022									16.7969	0.1298
							17.1484	-0.1746									17.1484	0.1358
							17.5	-0.147									17.5	0.1419
							17.8516	-0.1194									17.8516	0.1479
							18.2031	-0.0918									18.2031	0.154
							18.5547	-0.0642									18.5547	0.16
							18.9063	-0.0367									18.9063	0.1661
							19.2578	-0.0090767									19.2578	0.1721
							19.6094	0.0185									19.6094	0.1782
							19.9609	0.0461									19.9609	0.1842
							20.3125	0.0737									20.3125	0.1902
							20.6641	0.1013									20.6641	0.1963
							21.0156	0.1289									21.0156	0.2023
							21.3672	0.1564									21.3672	0.2084
							21.7188	0.184									21.7188	0.2144
							22.0703	0.2116									22.0703	0.2205
							22.4219	0.2392									22.4219	0.2265
							22.7734	0.2668									22.7734	0.2326
							23.125	0.2944									23.125	0.2386
							23.4766	0.322									23.4766	0.2447
							23.8281	0.3496									23.8281	0.2507
							24.1797	0.3772									24.1797	0.2567
							24.5313	0.4047									24.5313	0.2628
							24.8828	0.4323									24.8828	0.2688
							25.2344	0.4599									25.2344	0.2749
							25.5859	0.4875									25.5859	0.2809
							25.9375	0.5151									25.9375	0.287
							26.2891	0.5427									26.2891	0.293
							26.6406	0.5703									26.6406	0.299
							26.9922	0.5979									26.9922	0.3051
							27.3438	0.6255									27.3438	0.3111
							27.6953	0.6531									27.6953	0.3172
							28.0469	0.6806									28.0469	0.3232
							28.3984	0.7082									28.3984	0.3293
							28.75	0.7358									28.75	0.3353
							29.1016	0.7634									29.1016	0.3414
							29.4531	0.791									29.4531	0.3474
							29.8047	0.8186									29.8047	0.3534
							30.1563	0.8462									30.1563	0.3595
							30.5078	0.8738									30.5078	0.3655
							30.8594	0.9014									30.8594	0.3716
							31.2109	0.9289									31.2109	0.3776
							31.5625	0.9565									31.5625	0.3837
							31.9141	0.9841									31.9141	0.3897
							32.2656	1.0117									32.2656	0.3957
							32.6172	1.0393									32.6172	0.4018
							32.9688	1.0669									32.9688	0.4078
							33.3203	1.0945									33.3203	0.4139
							33.6719	1.1221									33.6719	0.4199
							34.0234	1.1497									34.0234	0.426
							34.375	1.1773									34.375	0.432
							34.7266	1.2048									34.7266	0.438
							35.0781	1.2324									35.0781	0.4441
							35.4297	1.26									35.4297	0.4501
							35.7813	1.2876									35.7813	0.4562
							36.1328	1.3152									36.1328	0.4622
							36.4844	1.3428									36.4844	0.4682
							36.8359	1.3704									36.8359	0.4743
							37.1875	1.398									37.1875	0.4803
							37.5391	1.4256									37.5391	0.4864
							37.8906	1.4531									37.8906	0.4924
							38.2422	1.4807									38.2422	0.4985
							38.5938	1.5083									38.5938	0.5045
							38.9453	1.5359									38.9453	0.5105
							39.2969	1.5635									39.2969	0.5166
							39.6484	1.5911									39.6484	0.5226
							40	1.6187									40	0.5287
