# Supplementary material for: Pore mutation N617D in the skeletal muscle DHPR blocks Ca2+ influx due to atypical high-affinity Ca2+ binding
Source: eLife journal article supplement (doi:10.7554/elife.63435), 2021-06-01
Supplement: figures [file elife-63435-figures-v2.pdf]

---

## Figures and figure supplements

Pore mutation N617D in the skeletal muscle DHPR blocks  $\text{Ca}^{2+}$  influx due to atypical high-affinity  $\text{Ca}^{2+}$  binding

**Anamika Dayal et al**

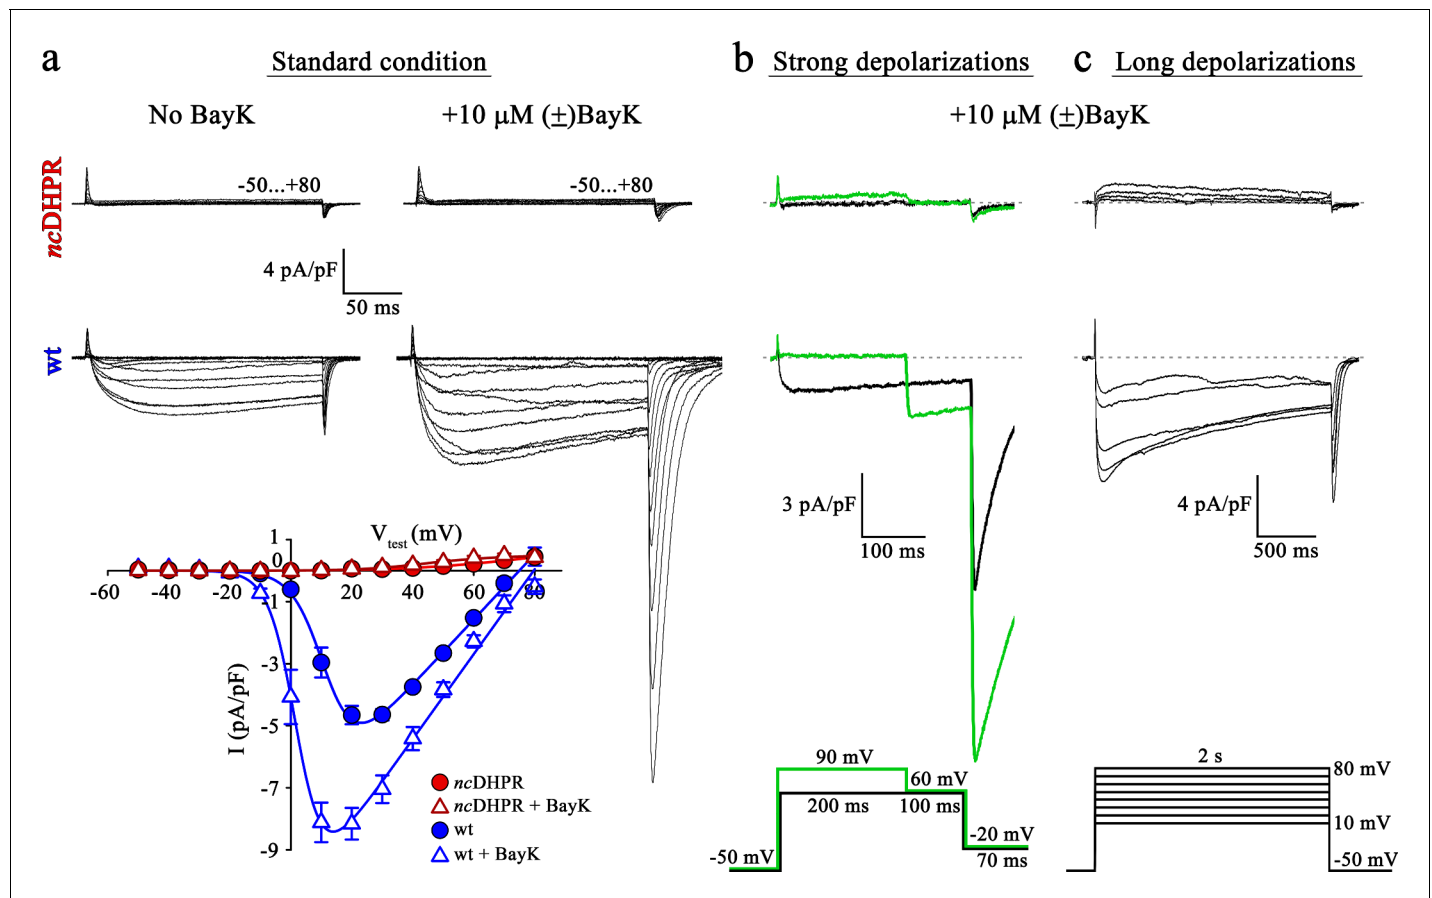

**Figure 1.** Mutant DHPR(N617D) remains  $\text{Ca}^{2+}$  impermeant despite strong or long depolarizations in the presence of DHP agonist Bay K. (a) Representative whole-cell  $\text{Ca}^{2+}$  current recordings elicited by 200 ms depolarizations from  $-50$  to  $+80$  mV from ncDHPR (top) and wt (center) myotubes before (left) and after (right) perfusion with  $10 \mu\text{M}$  of the DHP agonist ( $\pm$ )Bay K 8644. Scale bars, 50 ms (horizontal), 4 pA/pF (vertical). Plots of current-voltage relationship (bottom) indicates lack of DHPR inward  $\text{Ca}^{2+}$  currents in the absence ( $I_{\text{max}} = -0.02 \pm 0.01$  pA/pF;  $n = 8$ ) and presence ( $I_{\text{max}} = -0.02 \pm 0.01$  pA/pF;  $n = 5$ ) of ( $\pm$ )Bay K through ncDHPR myotubes, in contrast to significant ( $p < 0.001$ ) augmentation of  $\text{Ca}^{2+}$  currents in wt myotubes upon administration of ( $\pm$ )Bay K (No Bay K:  $I_{\text{max}} = -5.04 \pm 0.27$  pA/pF;  $n = 9$ ; with Bay K:  $I_{\text{max}} = -8.82 \pm 0.56$  pA/pF;  $n = 6$ ). (b) 200 ms strong depolarization to  $+90$  mV followed by 100 ms to  $+60$  mV and finally repolarization to  $-20$  mV for 70 ms (bottom, green lines) in the presence of  $10 \mu\text{M}$  ( $\pm$ )Bay K, were unable to evoke inward  $\text{Ca}^{2+}$  currents through DHPR(N617D) (top, with  $+90$  mV prepulse:  $I_{\text{max}} = -0.02 \pm 0.02$  pA/pF; without  $+90$  mV prepulse:  $I_{\text{max}} = 0.01 \pm 0.02$  pA/pF;  $n = 10$ ). Contrary, wt DHPR displayed significant ( $p < 0.01$ ) depolarization-induced potentiation of inward current at  $+60$  mV (with  $+90$  mV prepulse:  $I_{\text{max}} = -2.97 \pm 0.54$  pA/pF; without  $+90$  mV prepulse:  $I_{\text{max}} = -1.62 \pm 0.37$  pA/pF;  $n = 5$ ) (center). Upon subsequent repolarization from  $+60$  mV to  $-20$  mV, the tail current was also considerably larger ( $p < 0.01$ ) after the  $+90$  mV pre-conditioning pulse ( $I_{\text{tail}} = -19.36 \pm 3.59$  pA/pF;  $n = 5$ ) (center, green trace) than after the  $+60$  mV pulse ( $I_{\text{tail}} = -10.78 \pm 1.99$  pA/pF;  $n = 5$ ) (center, black trace). Statistical significance was calculated using paired t-test. Scale bars, 100 ms (horizontal), 3 pA/pF (vertical). (c) Likewise, 2 s long depolarizations from  $+10$  mV to  $+80$  mV in 10 mV increments (bottom) in the presence of  $10 \mu\text{M}$  ( $\pm$ )Bay K, were unable to induce  $\text{Ca}^{2+}$  influx through DHPR(N617D) (top,  $I_{\text{max}} = -0.05 \pm 0.02$  pA/pF;  $n = 5$ ). The same voltage protocol evoked robust inward  $\text{Ca}^{2+}$  currents through wt DHPR (center,  $I_{\text{max}} = -7.69 \pm 0.56$  pA/pF;  $n = 5$ ). Scale bars, 500 ms (horizontal), 4 pA/pF (vertical). Data are presented as mean  $\pm$  SEM; p determined by unpaired Student's t-test.

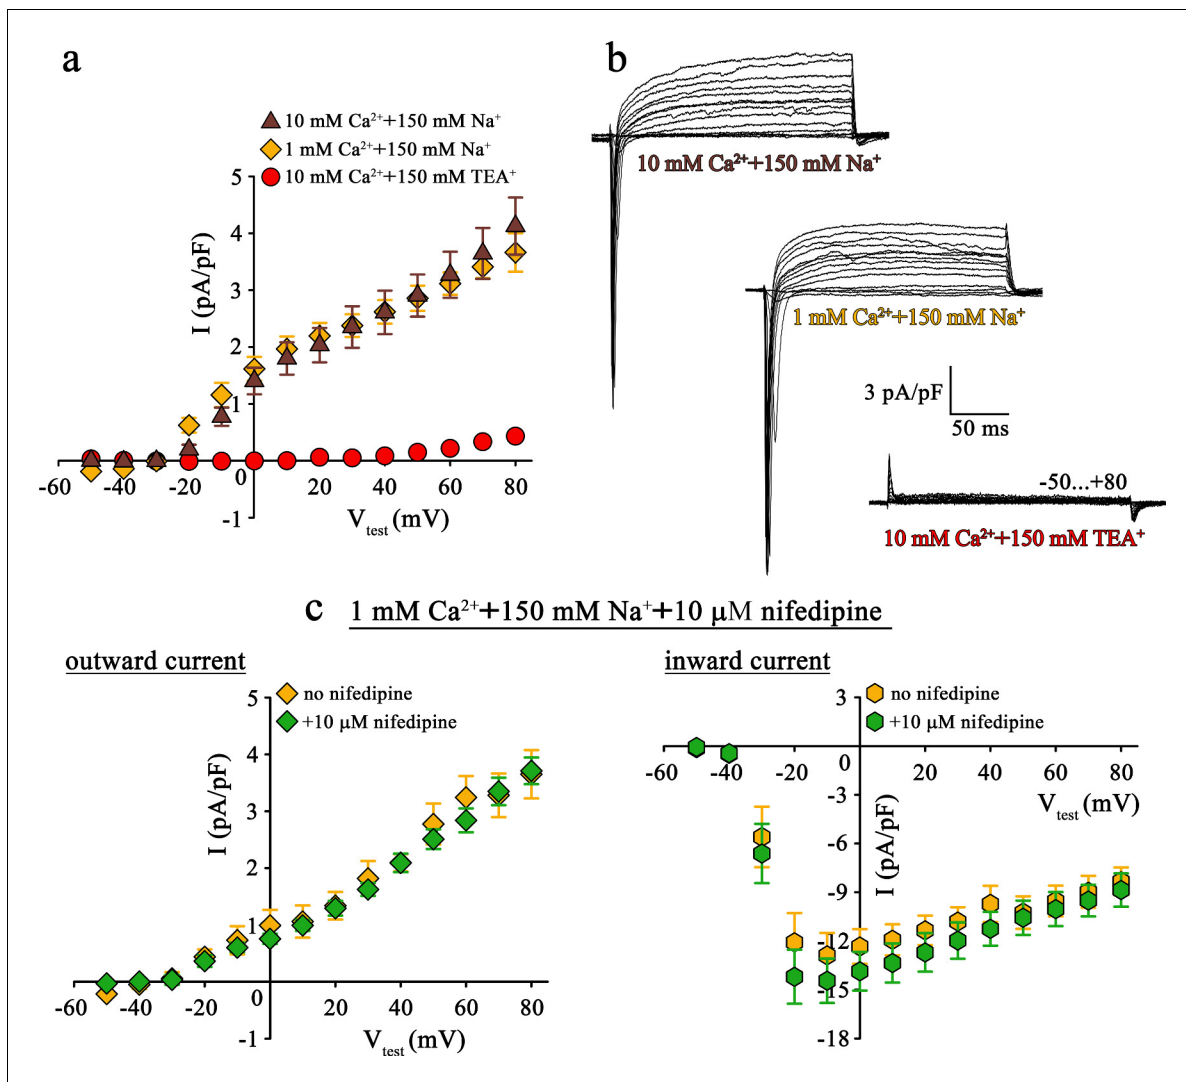

**Figure 2.** Mutant DHPR(N617D) does not conduct inward  $\text{Na}^{+}$  currents in the presence of near physiological  $[\text{Na}^{+}]$ . (a) Plots of current-voltage relationship for DHPR-mediated  $\text{Na}^{+}$  currents recorded from *ncDHPR* myotubes indicate the absence of slow-activating, non-inactivating inward  $\text{Na}^{+}$  currents in the presence of near physiological 150 mM external  $\text{Na}^{+}$  with either 10 mM ( $n = 8$ ) or 1 mM external  $\text{Ca}^{2+}$  ( $n = 9$ ). Control recordings were performed in standard bath solution (150 mM  $\text{TEA}^{+}$ , 10 mM  $\text{Ca}^{2+}$ ) ( $n = 8$ ). (b) Representative current recordings from *ncDHPR* myotubes in response to 200 ms depolarizing test pulses between  $-50$  to  $+80$  mV in the presence of 10 mM  $\text{Ca}^{2+}$  with either 150 mM  $\text{Na}^{+}$  (top) or 150 mM  $\text{TEA}^{+}$  (bottom), or 1 mM  $\text{Ca}^{2+}$  with 150 mM  $\text{Na}^{+}$  (center) in the bath solution. Scale bars, 50 ms (horizontal), 3 pA/pF (vertical). (c) Plots of current-voltage relationship for *ncDHPR* myotubes at 150 mM external  $\text{Na}^{+}$  and 1 mM external  $\text{Ca}^{2+}$  indicate no difference ( $p > 0.05$ ) in outward and inward currents in the presence ( $n = 10$ ) and absence ( $n = 6$ ) of 10  $\mu\text{M}$  of the 1,4-DHP antagonist nifedipine.

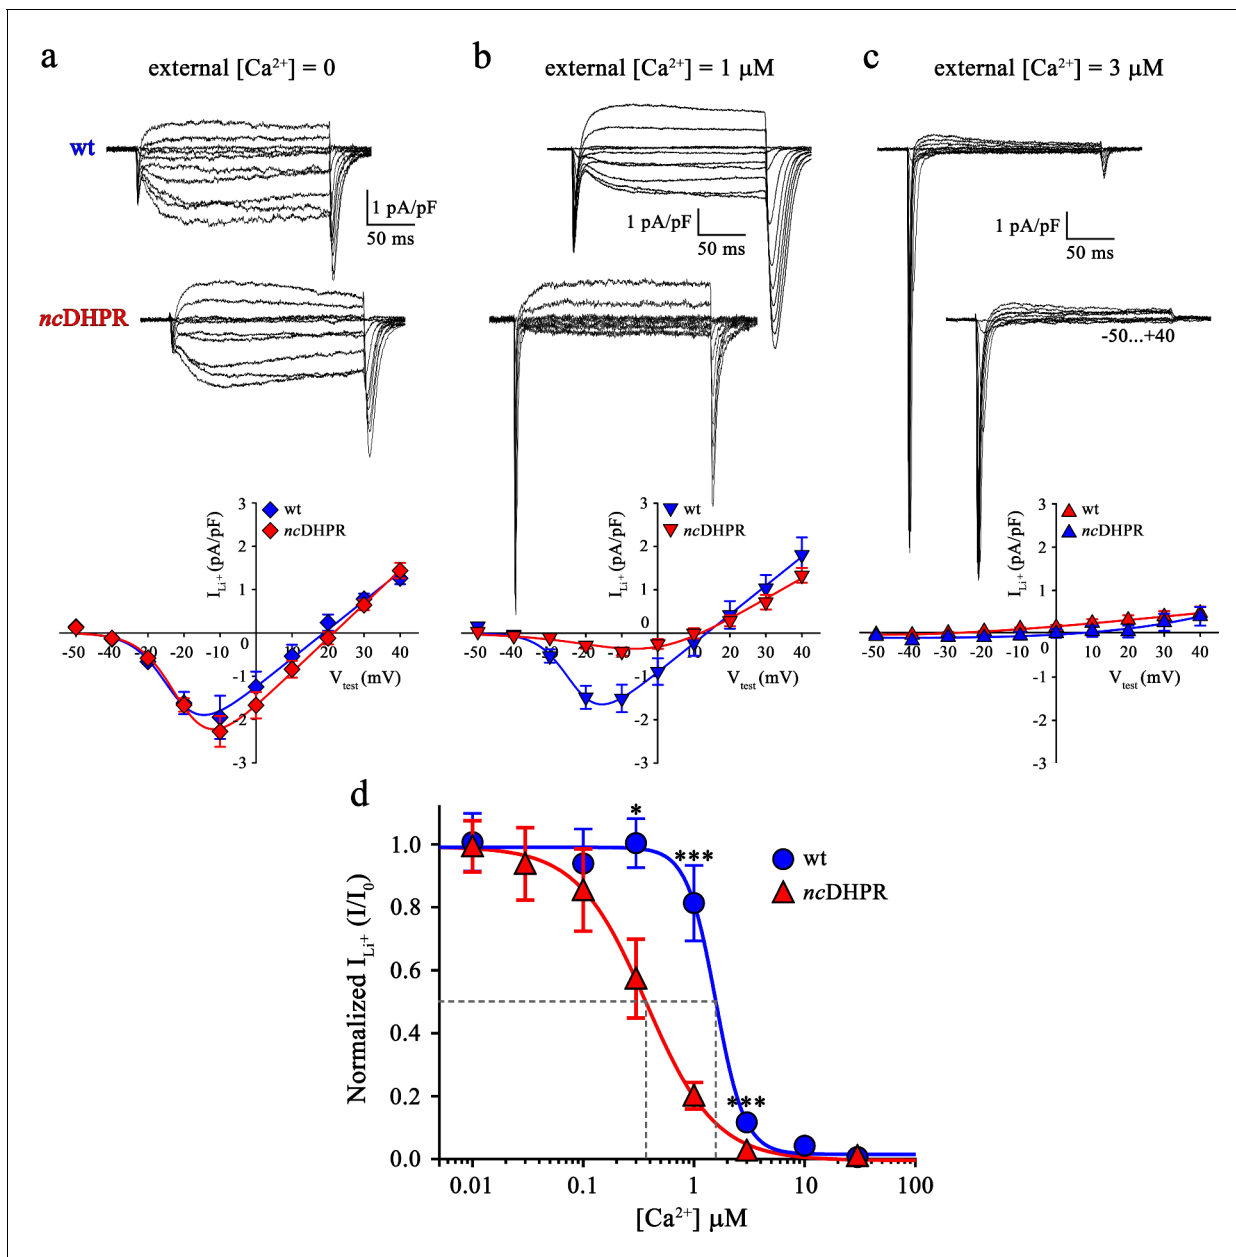

**Figure 3.** Binding of  $Ca^{2+}$  ions with nanomolar affinity within the pore of mutant DHPR(N617D) precludes  $Ca^{2+}$  permeation. Representative whole-cell  $Li^+$  current recordings from wt and ncDHPR myotubes in response to 200 ms depolarizations from  $-50$  to  $+40$  mV in the presence of 100 mM external  $Li^+$  and either 0 (a), 1  $\mu M$  (b) or 3  $\mu M$  (c) free external  $Ca^{2+}$ . Scale bars, 50 ms (horizontal), 1 pA/pF (vertical). Plots of current-voltage relationship are depicted at the bottom of the corresponding representative  $Li^+$  current traces. Inward  $Li^+$  currents with no blocking ion (free  $[Ca^{2+}] = 0$ ) were indistinguishable ( $p > 0.05$ ) between ncDHPR ( $I_{max} = -2.32 \pm 0.35$  pA/pF;  $n = 16$ ) and wt ( $I_{max} = -2.07 \pm 0.47$  pA/pF;  $n = 9$ ) myotubes (a, bottom). However, at higher external  $[Ca^{2+}]$  of 1  $\mu M$  (b) and 3  $\mu M$  (c), inward  $Li^+$  currents were significantly ( $p < 0.001$ ) smaller in ncDHPR ( $I_{max} = -0.47 \pm 0.10$  pA/pF,  $n = 8$ ;  $I_{max} = -0.06 \pm 0.02$  pA/pF;  $n = 7$ , respectively) compared to wt myotubes ( $I_{max} = -1.68 \pm 0.25$  pA/pF,  $n = 6$ ;  $I_{max} = -0.24 \pm 0.04$  pA/pF;  $n = 6$ , respectively). (d) Four-parameter fitted concentration-response curves of  $Ca^{2+}$  block of inward  $Li^+$  currents for wt and mutant ncDHPR. Averaged  $I/I_0$  peak currents are plotted as a function of free external  $Ca^{2+}$  concentrations (up to 30  $\mu M$ ) and each data point is an average of 5–16 myotubes (Table 1). There is a significant ( $p < 0.01$ ) shift in  $IC_{50}$  (grey dotted lines) between wt ( $IC_{50} = 1.57 \mu M$ ) and ncDHPR ( $IC_{50} = 0.37 \mu M$ ) indicating a 4.2-fold higher  $Ca^{2+}$  pore-binding affinity in the mutant DHPR(N617D) channel. Data are presented as mean  $\pm$  SEM;  $p$  determined by unpaired Student's  $t$ -test.

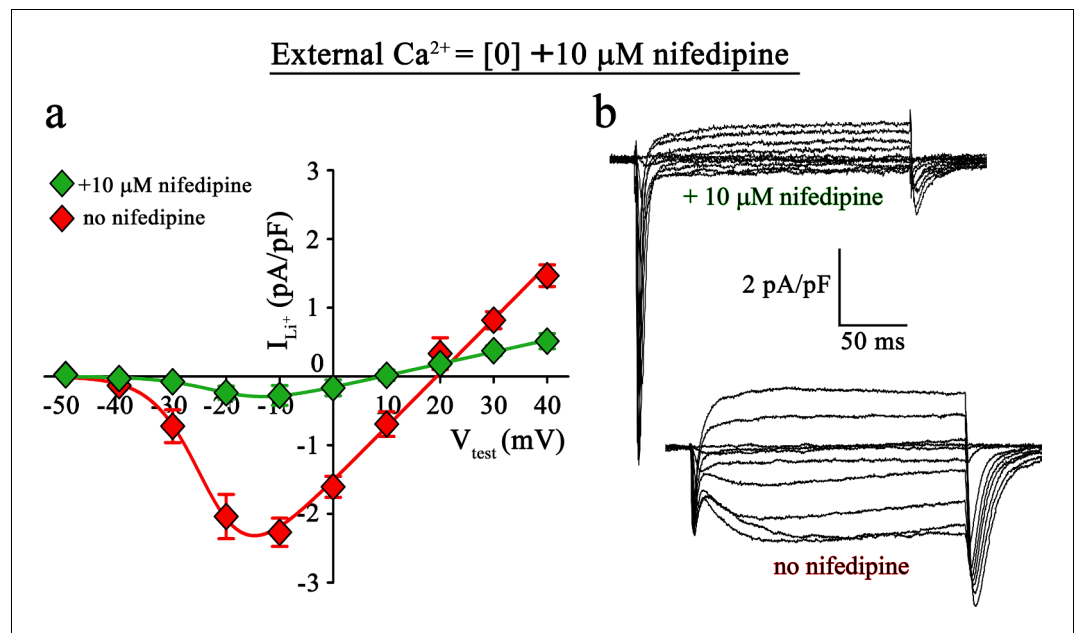

**Figure 4.** Inward  $\text{Li}^+$  currents conducted by DHPR(N617D) are sensitive to nifedipine block. (a) Plots of current-voltage relationship for DHPR-mediated  $\text{Li}^+$  currents recorded from *ncDHPR* myotubes in the presence ( $I_{\text{max}} = -0.35 \pm 0.13$  pA/pF;  $n = 16$ ) and absence ( $I_{\text{max}} = -2.41 \pm 0.27$  pA/pF;  $n = 11$ ) of 10  $\mu\text{M}$  of the 1,4-DHP antagonist nifedipine, 100 mM external  $\text{Li}^+$ , and free external  $\text{Ca}^{2+} = [0]$ . Maximum inward  $\text{Li}^+$  currents were significantly ( $p < 0.001$ ) reduced in the presence of nifedipine. (b) Representative whole-cell  $\text{Li}^+$  current recordings from *ncDHPR* myotubes in response to 200 ms depolarizations from  $-50$  to  $+40$  mV in the presence (upper) and absence (lower) of 10  $\mu\text{M}$  nifedipine with 100 mM external  $\text{Li}^+$  and 0 external  $\text{Ca}^{2+}$  concentration. Scale bars, 50 ms (horizontal), 2 pA/pF (vertical). Data are presented as mean  $\pm$  SEM;  $p$  determined by unpaired Student's  $t$ -test.

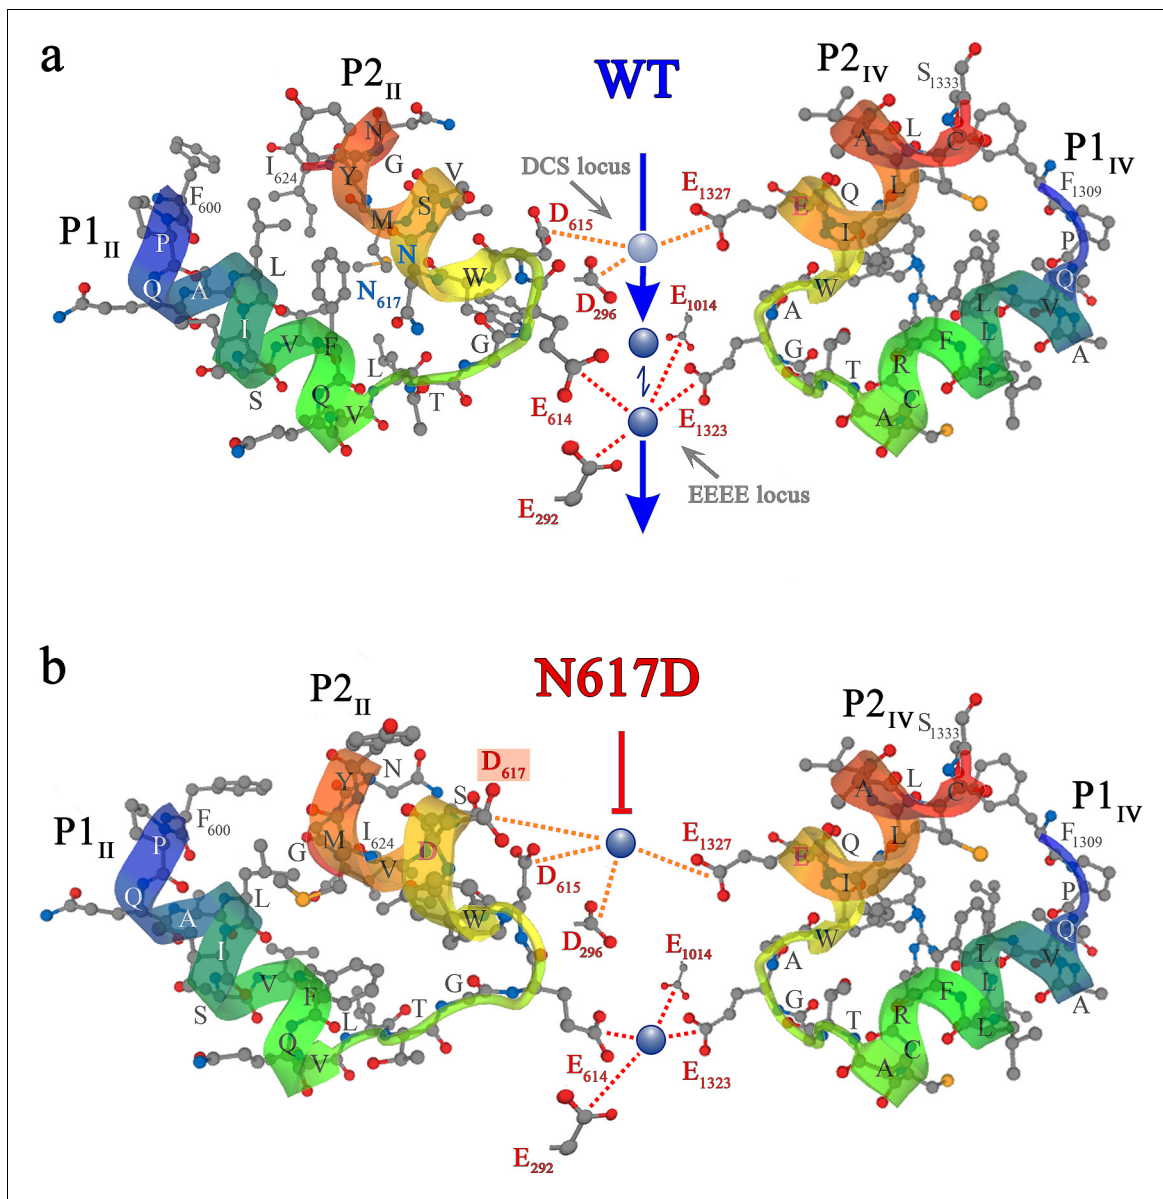

**Figure 5.** Ca<sup>2+</sup> selectivity and conduction mechanisms in the wt and mutant DHPR(N617D) channel pore. (a, b) De novo conformation prediction of peptide F<sub>600</sub> - I<sub>624</sub> constituting the selectivity filter and adjacent pore helices P1 and P2 of DHPR $\alpha_{15}$  repeat II (P1<sub>II</sub>, P2<sub>II</sub>) (left) and of peptide F<sub>1309</sub> - S<sub>1333</sub> forming the opposite repeat IV (P1<sub>IV</sub>, P2<sub>IV</sub>) (right), using the program PEP-FOLD 3.5 (Thévenet et al., 2012) on the RPBS web portal. Resulting clusters from 200 independent simulations were sorted by sOPEP energy (Wang et al., 2011) to yield the 'best model' prediction. Biasing the model prediction of these peptides by imposing the reference structure of DHPR $\alpha_{15}$  according to the Protein Data Bank (PDB accession number 5GJV) (Wu et al., 2016) did not lead to major differences compared to unbiased modeling approaches and hence we used unbiased models for the wt (a) and DHPR(N617D) (b) inner channel pore. Depicted best models are graphical overlays of cartoon and balls and sticks input style options. Models depict the hypothetical mechanism of Ca<sup>2+</sup> conduction through the wt DHPR (a) and the block of Ca<sup>2+</sup> conduction due to atypical high Ca<sup>2+</sup> binding affinity (because of introduction of the negative charge D<sub>617</sub>; boxed in red) in the DHPR(N617D) pore region. Dotted lines indicate binding interactions between Ca<sup>2+</sup> ions (blue spheres) and carboxyl oxygens (red balls) of glutamate E<sub>292</sub> and aspartate D<sub>296</sub> of repeat I, E<sub>614</sub>, D<sub>615</sub>, and D<sub>617</sub> of repeat II, E<sub>1014</sub> of repeat III, as well as E<sub>1323</sub> and E<sub>1327</sub> of repeat IV. Low affinity Ca<sup>2+</sup> binding is indicated with a light blue sphere and high-affinity binding with dark blue spheres. DCS locus is the divalent cation selectivity filter (Cens et al., 2007) and EEEE locus is the Ca<sup>2+</sup> selectivity filter. Vertical blue arrows indicate active Ca<sup>2+</sup> conduction pathway in wt DHPR (a) and red T-bar indicates block of Ca<sup>2+</sup> flux by aberrant high-affinity binding to the DCS locus in the mutant DHPR (N617D) channel pore (b). See Figure 5—figure supplement 1 for additional blocking strategies of DHPR Ca<sup>2+</sup> conduction in the evolution of skeletal muscle EC coupling.

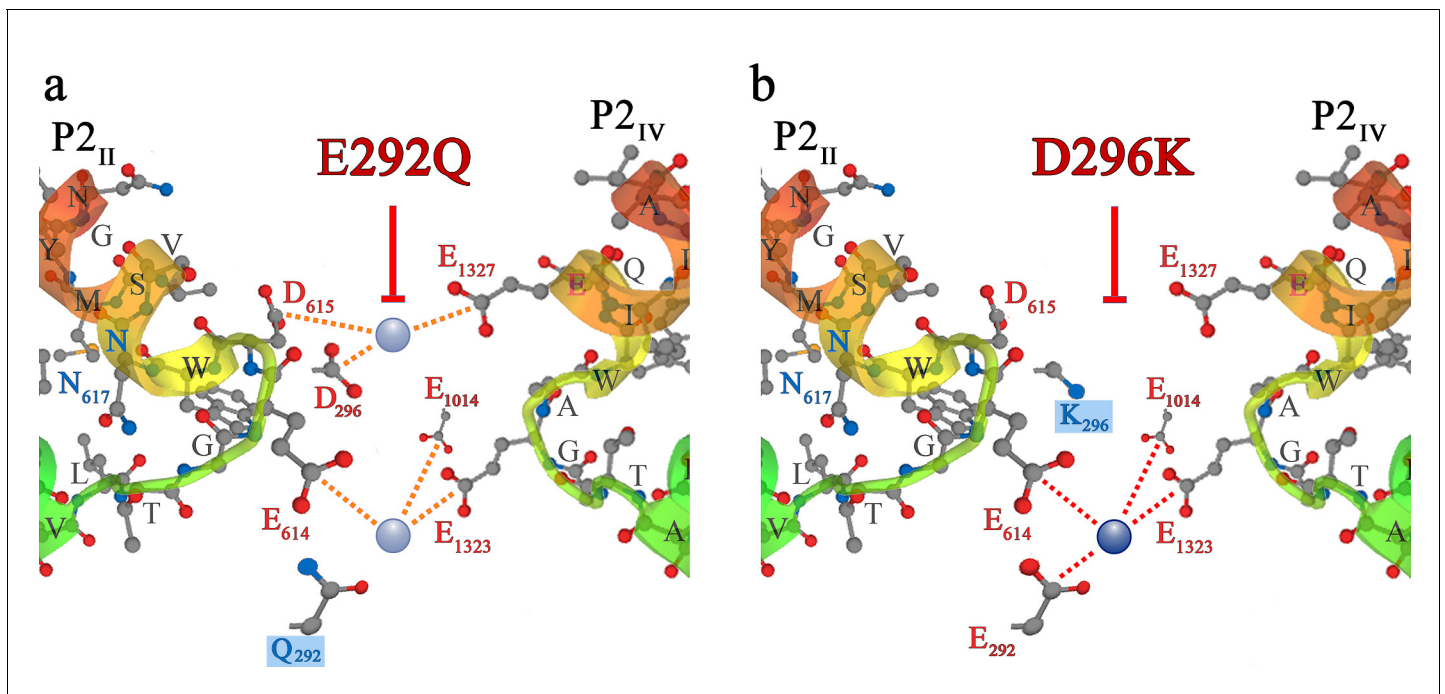

**Figure 5—figure supplement 1.** Additional blocking strategies of DHPR  $\text{Ca}^{2+}$  conductance in the evolution of skeletal muscle EC coupling. Symbols and nomenclature are identical to **Figure 5**. (a) Zebrafish slow-muscle specific DHPR $\alpha_{15}$  carries a distorted EEEE locus, due to substitution of E<sub>292</sub> of repeat I by Q. Exchange of E<sub>292</sub> with Q<sub>292</sub> (boxed in blue) in rabbit DHPR $\alpha_{15}$  yielded mutant DHPR(E292Q) which lacks  $\text{Ca}^{2+}$  conductance (red T-bar) due to alteration of the high-affinity EEEE locus to a low affinity QEEE motif. (b) In phylogenetically advanced teleost species, the DCS locus is distorted due to charge conversion, that is exchange of D with K in repeat I. Substitution of D<sub>296</sub> with K<sub>296</sub> (boxed in blue) in rabbit DHPR $\alpha_{15}$  yielded mutant DHPR(D296K), which lacks  $\text{Ca}^{2+}$  conductance (red T-bar) due to non-binding of  $\text{Ca}^{2+}$  to the DCS locus and thus, lack of the attraction mechanism for tubular  $\text{Ca}^{2+}$ .



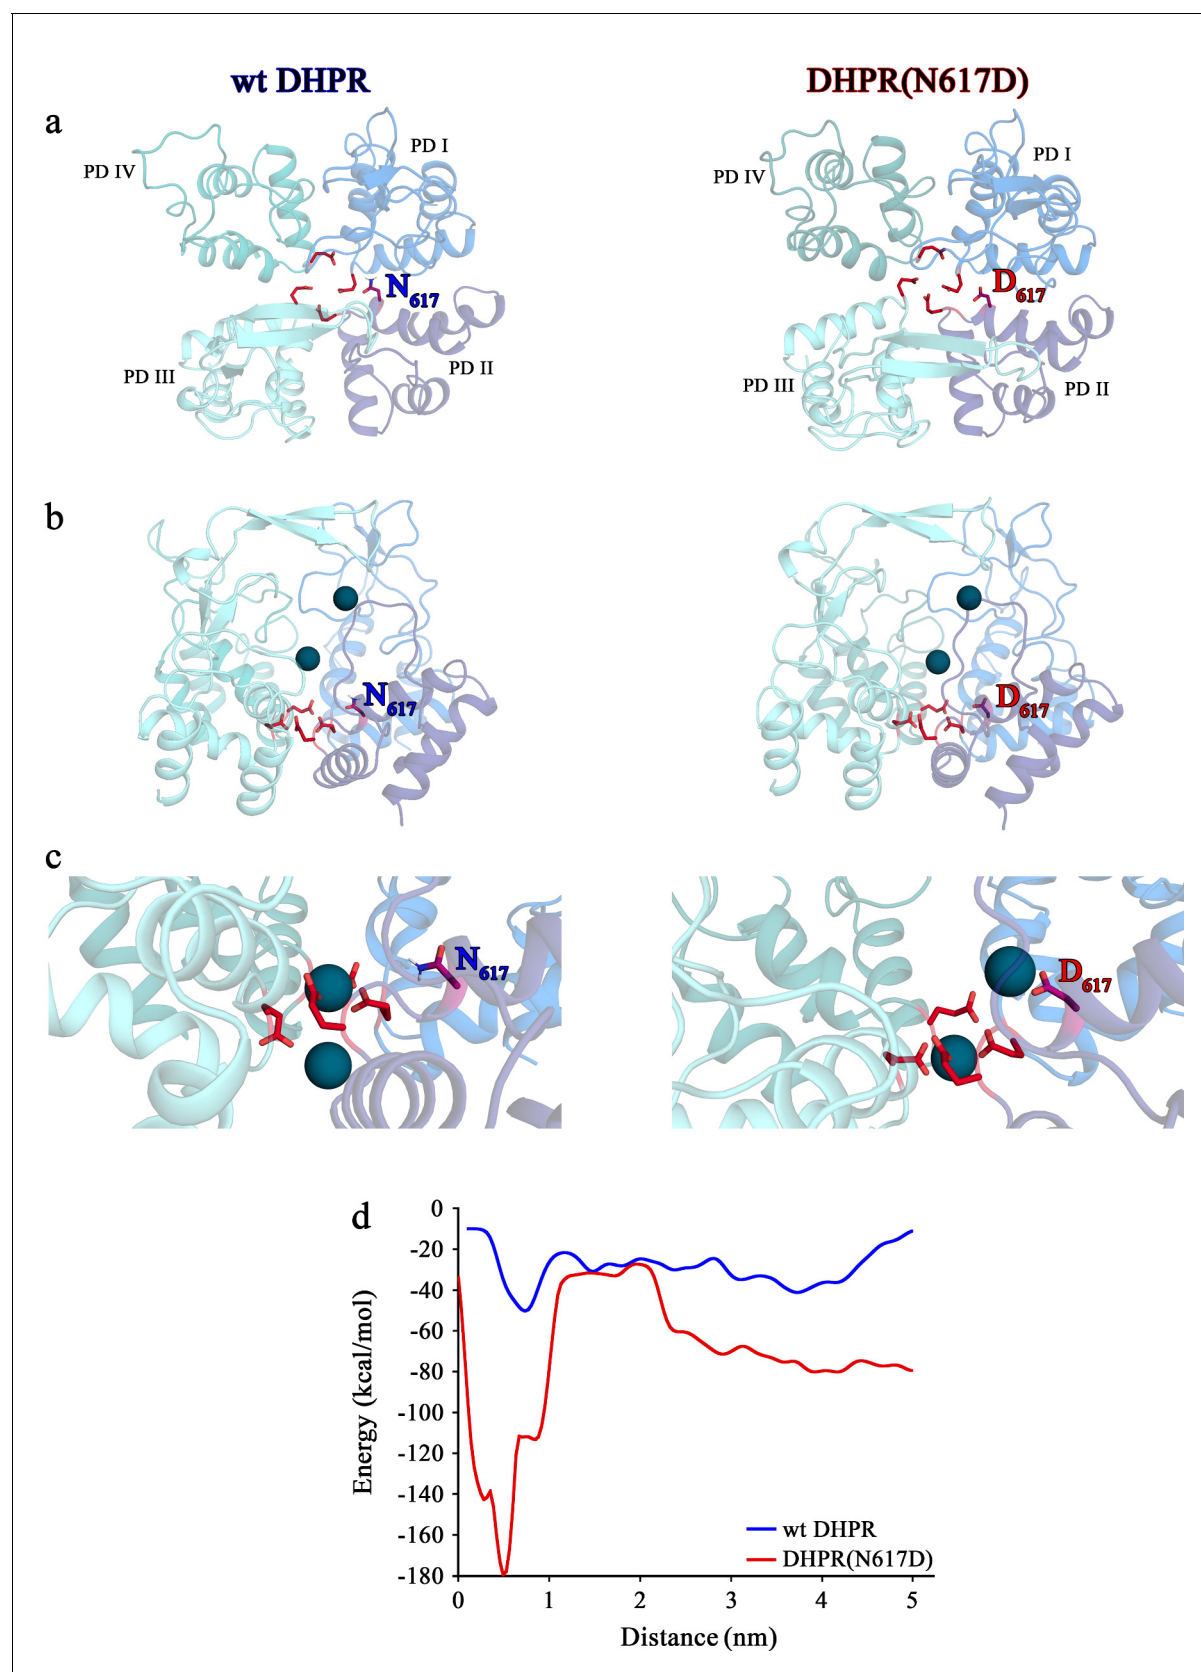

**Figure 6.** Structure models of selectivity filter regions of wt DHPR (left panels) and mutant DHPR(N617D) channel pores (right panels) showing the movements of Ca<sup>2+</sup> ions in simulation studies. (a) Top view of the pore illustrating the EEEE and DCS loci. The residues of the EEEE locus are highlighted in red. The residues of the DCS locus are highlighted in blue. (b) Side view of the pore showing the movement of Ca<sup>2+</sup> ions (black spheres) through the selectivity filter. (c) Close-up view of the selectivity filter region showing the movement of Ca<sup>2+</sup> ions (black spheres) through the filter. (d) Energy profile (kcal/mol) versus Distance (nm) for the movement of Ca<sup>2+</sup> ions through the selectivity filter. The blue line represents wt DHPR, and the red line represents DHPR(N617D). The energy profile shows a significant energy barrier for the mutant, reaching a minimum of approximately -180 kcal/mol at a distance of about 0.5 nm, while the wt DHPR shows a much lower energy barrier, reaching a minimum of approximately -40 kcal/mol at a distance of about 0.5 nm.

Figure 6 continued on next page



## Figure 6 continued

displayed in *red* and the DCS locus is indicated by the position of the residues N<sub>617</sub> or D<sub>617</sub>. (b) Side view of wt DHPR and mutant DHPR(N617D) pores with Ca<sup>2+</sup> ions present in the pore before starting the equilibration. The *dark blue spheres* represent van der Waals radii of the Ca<sup>2+</sup> ions. (c) Snapshots immediately following the equilibration run show that Ca<sup>2+</sup> ions already moved towards the DCS and EEEE loci. While the front Ca<sup>2+</sup> ion already leaves the selectivity filter of the wt DHPR toward the cytosolic side, Ca<sup>2+</sup> ions in the DHPR(N617D) pore are still bound to the DCS and EEEE loci. (d) Free energy estimations from metadynamics simulations capturing the movements of Ca<sup>2+</sup> ions through the selectivity filter region. The free energy profile for the passage of Ca<sup>2+</sup> ions through wt DHPR selectivity filter is depicted in *blue* and for mutant DHPR(N617D) in *red*. The energy barrier of the Ca<sup>2+</sup> ion leaving the wt DHPR selectivity filter ( $15 \pm 4$  kcal/mol;  $n = 5$ ) is significantly smaller ( $p < 0.001$ ) compared to DHPR(N617D) ( $122 \pm 20$  kcal/mol;  $n = 5$ ). The process was described by a one-dimensional collective variable that is, the displacement of a Ca<sup>2+</sup> ion along the axis of the channel pore. A second Ca<sup>2+</sup> was directly present in the simulation domain. Thus, the energy profile corresponds to the energy experienced by the first Ca<sup>2+</sup> ion in the presence of the second one. See **Figure 6—video 1** and **Figure 6—video 2** for illustration of the movement of Ca<sup>2+</sup> ions through the selectivity filter region of wt DHPR and DHPR(N617D) channel pores, respectively.
